1 **Characteristics of a novel NMR-based metabolomics platform for dogs**

2 Claudia Ottka<sup>1\*</sup>, Katariina Vapalahti<sup>1,2,3</sup>, Jenni Puurunen<sup>2,3</sup>, Laura Vahtera<sup>2,3</sup>, Hannes Lohi<sup>1,2,3\*</sup>.

3 <sup>1</sup> PetBIOMICS Ltd, Helsinki, Finland

4 <sup>2</sup> Department of Veterinary Biosciences and Department of Medical and Clinical Genetics, University of Helsinki,  
5 Helsinki, Finland

6 <sup>3</sup> Folkhälsan Research Center, Helsinki, Finland

7 Claudia Ottka

8 [claudia.ottka@petbiomics.com](mailto:claudia.ottka@petbiomics.com)

9 <https://orcid.org/0000-0003-4837-6309>

10 Katariina Vapalahti

11 <https://orcid.org/0000-0002-0855-8776>

12 Jenni Puurunen

13 <https://orcid.org/0000-0001-5166-493X>

14 Laura Vahtera

15 <https://orcid.org/0000-0002-5369-024X>

16 Hannes Lohi

17 [hannes.lohi@helsinki.fi](mailto:hannes.lohi@helsinki.fi)

18 <https://orcid.org/0000-0003-1087-5532>

19 \*corresponding authors

20

21 **Abstract**

22 Metabolomics has proven itself an invaluable research tool, providing comprehensive insight to systemic metabolism.  
23 However, the lack of scalable and quantitative methods with known reference intervals and documented reproducibility  
24 has prevented the use of metabolomics in the clinical setting. This study describes the development and validation of a  
25 quantitative nuclear magnetic resonance (NMR) -based metabolomics platform for canine serum and plasma samples.  
26 Altogether 8247 canine samples were analyzed using a Bruker's 500 MHz NMR spectrometer. Using statistical  
27 approaches derived from international guidelines, we defined reference intervals for 123 biomarkers, studied method  
28 precision, analyte storage stability, the effect of prolonged contact to red blood cells, differences of blood collection

29 tubes, interference of lipemia, hemolysis and bilirubinemia, method comparison, and demonstrated the method's  
30 practical relevance in a hyperglycemic cohort. Owing to the advantages of quantitative results, high reproducibility, and  
31 scalability, this canine metabolomics platform holds great potential for numerous clinical and research applications to  
32 improve canine health and well-being.

33

34 **Keywords: canine, metabolomics, NMR, reference intervals, precision, stability**

35

36 Metabolomics is an omics-based approach that generates comprehensive information on metabolism, enabling an  
37 extensive view on the current state of systemic metabolism. Metabolomics has become increasingly popular in canine  
38 studies. It is especially suitable in characterizing metabolic effects of multiple environmental and inter- and intra-  
39 individual<sup>1</sup> factors including feeding<sup>2-6</sup>, aging<sup>7</sup>, inter-breed differences<sup>8,9</sup>, drug action<sup>10,11</sup>, behavior<sup>12,13</sup>, exercise<sup>14</sup>,  
40 genetic factors<sup>15</sup> and pathological processes<sup>16-26</sup>.

41 Mass spectrometry (MS) and proton nuclear magnetic resonance (NMR) spectroscopy are the two main technologies for  
42 metabolic profiling, both in human and animal studies<sup>27</sup>. Proton NMR spectroscopy offers quantitative data with high  
43 reproducibility, high throughput and excellent scalability in a non-destructive and cost-effective manner<sup>27</sup>. NMR  
44 spectroscopy is well suited for the scientific use of large cohorts and biobanks<sup>28,29</sup> and is highly suitable for studies  
45 combining different omics technologies<sup>29-31</sup>. Due to the quantitative and highly reproducible nature of NMR  
46 spectroscopy, it can be easily utilized as a diagnostic tool and research findings can be easily applied to clinical use.

47 Metabolomics holds great potential in clinical diagnostics. It is a promising tool for highlighting the metabolic  
48 alterations associated with the emergence and progression of diseases, early disease detection and individualization of  
49 treatment<sup>32-34</sup>. Clinical diagnostics and decision-making have formerly relied on the use of single clinical chemistry  
50 biomarkers. The routinely used approach is largely unusable for risk prediction, since changes are typically only seen  
51 when the diseased state has already been reached<sup>33,35</sup>. Thus, preventive and supportive care measures cannot be  
52 undertaken before organ failure is already present. Interpretation of the results by the traditional approach might also be  
53 challenging, since multiple simultaneous metabolic phenomena can affect the interpretation of these results and multiple  
54 diseases can be associated with similar laboratory results<sup>22,35-37</sup>. Moreover, evaluations of disease severity lack accuracy  
55 when only one affected metabolic pathway is taken into account<sup>34,37</sup>. Furthermore, traditional diagnostic approaches do  
56 not take the metabolic state of the patient into account, although it might have an impact on the best treatment of the  
57 patient<sup>34,38</sup>.

58 The prerequisites for the utility of a particular method include documentation of the method's reproducibility,  
59 understanding of confounding factors that might affect the interpretation of the results, and the formation of reference  
60 intervals<sup>39</sup>. All of these factors have previously been largely unpublished in the canine metabolomics field. In this study,  
61 we describe the development and validation of a novel NMR-based metabolomics platform for dogs, demonstrate its  
62 performance characteristics, publish the determined dog-specific reference intervals for its biomarkers and demonstrate  
63 its utility in a practical situation.

64

65 **Results**

66 To develop and validate a quantitative NMR-based approach for canine metabolomics, a total of 8247 serum or plasma  
67 samples were collected and analyzed. Thirty of these were pooled samples, 912 were replicate samples of client-owned  
68 dogs, 999 leftover clinical laboratory samples, and 6306 were single samples of client-owned dogs (Supplementary  
69 Figure 1). The number of individual client-owned dogs with samples collected during this project was 6164  
70 (Supplementary Table 1). Eighteen percent of the dogs were under one year of age, 61% aged 1-7, and 21% over 7  
71 years of age. Males consisted 40% of the population and samples were taken from 256 breeds.

72 **Proton NMR spectroscopy quantitates 123 biomarkers**

73 All samples were analyzed with Bruker's 500 MHz NMR spectrometer with spectral data interpreted by in-house  
74 scripts following principles demonstrated for human samples<sup>40</sup>. The NMR method was able to quantify 123 biomarkers,  
75 including extensive lipoprotein profiling, fatty acids, amino acids, albumin, creatinine and glycolysis related  
76 metabolites, in canine serum/plasma (Fig 1).

# BIOMARKERS

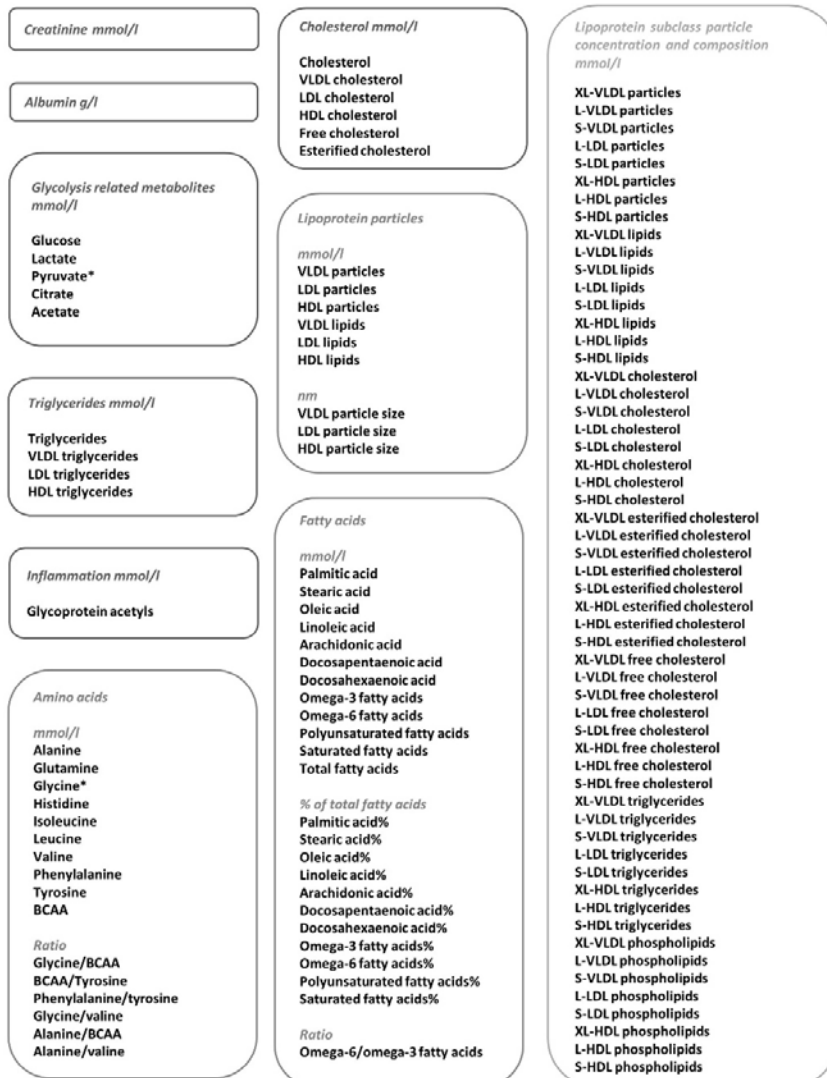

77

78 **Fig 1.** The biomarkers quantified by the NMR metabolomics testing platform.

79 \*: not available from EDTA-plasma samples.

80 BCAA: Branched-chain amino acids

81 XL-VLDL: Chylomicrons and very large VLDL-particles

82 L-VLDL: large VLDL particles

83 S-VLDL: small VLDL-particles

84 L-LDL: large LDL particles

85 S-LDL: small LDL particles

86 XL-HDL: very large HDL particles

87 L-HDL: large HDL particles

88 S-HDL: small HDL particles

89

90

91 **Reference intervals for puppies, adult and senior dogs**

92 We determined reference intervals (RI) (Table 1, Supplementary Table 2) with 90% confidence intervals (CI)

93 (Supplementary Table 2) for 123 metabolites in serum and heparin plasma samples.

94 In certain analytes, such as XL-VLDL variables, the concentration in healthy animals was very low, causing highly

95 skewed distributions. Also, automatic rejection of extremely low values by the platform's quality control, caused

96 inability to calculate CIs with the used non-parametric method. For these analytes, the lower reference limit was

97 rounded to 0. For a multitude of analytes, the 90% CI width was higher than 20% of the RI width, due to skewed or

98 heavy tailed distributions. This was especially observed in RI for puppies and senior dogs, where the n count was lower

99 ( $n < 170$ ) than in adult dogs. However, for some analytes, it was also observed in RIs with very high n counts ( $n > 800$ ).

100

101 RIs of puppies differed from the RIs of adult dogs in many analytes, such as glucose, lactate, creatinine, albumin,

102 glycine, glutamine, leucine, valine, branched chain amino acids (BCAA), VLDL particle size, and HDL and LDL

103 triglycerides. The higher reference limit (RL) of senior dogs exceeded the higher RL of adult dogs for alanine, tyrosine,

104 alanine/BCAA, glycoprotein acetyls (GlycA), oleic acid, docosahexaenoic acid%, HDL triglycerides, S-VLDL lipids

105 and L-HDL triglycerides.

106 Table 1. Established reference intervals for the validated biomarkers.

| Analyte               | HP all dogs | S all dogs | S puppy                | S adult   | S senior             |
|-----------------------|-------------|------------|------------------------|-----------|----------------------|
| Glucose mmol/l        | 4.3-6.8     | 4.4-6.8    | 4.7-7.3 <sup>a</sup>   | 4.4-6.6   | 4.0-6.1              |
| Lactate mmol/l        | 0.7-3.0     | 1.1-3.6    | 1.3-2.9 <sup>b</sup>   | 1.1-3.6   | 1.1-4.2              |
| Creatinine mmol/l     | 40-99       | 32-103     | 21-96 <sup>b</sup>     | 40-108    | 37-104               |
| Albumin mg/dl         | 26-32       | 25-32      | 22-31 <sup>b</sup>     | 26-32     | 26-32                |
| Cholesterol mmol/l    | 3.8-10.4    | 3.6-10.3   | 3.8-10.1               | 3.6-10.3  | 3.5-10.6             |
| Triglycerides mmol/l  | 0.22-0.97   | 0.19-1.00  | 0.18-0.76              | 0.19-0.97 | 0.19-1.13            |
| Pyruvate $\mu$ mol/l  | 29-155      | 11-107     | 9-96                   | 11-111    | 13-109               |
| Citrate $\mu$ mol/l   | 63-122      | 61-123     | 57-115                 | 61-124    | 62-128               |
| Acetate $\mu$ mol/l   | 19-36       | 21-37      | 22-40                  | 21-37     | 20-37                |
| Alanine $\mu$ mol/l   | 214-584     | 216-597    | 205-504                | 205-583   | 244-650 <sup>a</sup> |
| Glycine $\mu$ mol/l   | 147-466     | 130-454    | 145-594 <sup>a,b</sup> | 127-381   | 128-403              |
| Glutamine $\mu$ mol/l | 570-919     | 640-1,015  | 642-997 <sup>b</sup>   | 659-1,028 | 616-1,014            |
| Histidine $\mu$ mol/l | 50-91       | 53-98      | 46-93                  | 55-99     | 55-97                |

|                                        |               |               |                        |               |                        |
|----------------------------------------|---------------|---------------|------------------------|---------------|------------------------|
| Isoleucine $\mu\text{mol/l}$           | 33-80         | 37-89         | 30-80 <sup>a</sup>     | 38-92         | 38-87                  |
| Leucine $\mu\text{mol/l}$              | 74-168        | 83-185        | 67-159 <sup>b</sup>    | 89-186        | 94-186                 |
| Valine $\mu\text{mol/l}$               | 107-245       | 113-251       | 80-236 <sup>b</sup>    | 119-260       | 124-253                |
| Phenylalanine $\mu\text{mol/l}$        | 32-64         | 30-65         | 28-66                  | 29-64         | 34-66                  |
| Tyrosine $\mu\text{mol/l}$             | 39-85         | 41-89         | 39-83                  | 41-90         | 46-93 <sup>a</sup>     |
| BCAA $\mu\text{mol/l}$                 | 222-482       | 242-515       | 178-462 <sup>b</sup>   | 261-524       | 251-521                |
| Glycine/BCAA                           | 0.3-1.4       | 0.3-1.5       | 0.4-3.0 <sup>a</sup>   | 0.3-1.2       | 0.3-1.2                |
| BCAA/Tyrosine                          | 3.7-9.5       | 3.8-9.2       | 3.8-8.3 <sup>a</sup>   | 3.9-9.5       | 3.5-8.6                |
| Phenylalanine/tyrosine                 | 0.6-1.2       | 0.5-1.0       | 0.5-1.1                | 0.5-1.0       | 0.5-1.0                |
| Glycine/valine                         | 0.6-2.6       | 0.7-3.0       | 0.9-6.8 <sup>a</sup>   | 0.7-2.5       | 0.7-2.6                |
| Alanine/BCAA                           | 0.7-2.0       | 0.6-1.6       | 0.6-1.4                | 0.5-1.6       | 0.6-1.8 <sup>a</sup>   |
| Alanine/valine                         | 1.3-3.7       | 1.2-3.5       | 1.3-3.0                | 1.1-3.5       | 1.3-3.8                |
| VLDL lipids $\text{mmol/l}$            | 0.1-1.1       | 0.1-1.2       | 0.1-0.8                | 0.1-1.1       | 0.1-1.3                |
| VLDL particles $\text{nmol/l}$         | 15-54         | 12-54         | 14-45                  | 12-51         | 12-67                  |
| LDL lipids $\text{mmol/l}$             | 0.5-3.7       | 0.7-3.7       | 0.7-3.7                | 0.7-3.6       | 0.7-4.5                |
| LDL particles $\text{nmol/l}$          | 200-1,400     | 240-1,300     | 270-1,300              | 240-1,300     | 240-1,600              |
| HDL lipids $\text{mmol/l}$             | 7.7-14.6      | 6.9-15.1      | 7.2-15.0               | 6.9-15.1      | 6.6-15.3               |
| HDL particles $\text{nmol/l}$          | 32,000-57,000 | 30,000-58,000 | 33,000-58,000          | 30,000-59,000 | 28,000-58,000          |
| VLDL particle size $\text{nm}$         | 35.8-43.6     | 35.2-43.8     | 35.1-41.7 <sup>a</sup> | 35.3-43.8     | 35.4-44.4              |
| LDL particle size $\text{nm}$          | 22.1-23.9     | 22.2-23.5     | 22.3-23.5              | 22.2-23.4     | 22.2-23.5              |
| HDL particle size $\text{nm}$          | 10.1-10.7     | 10.1-10.7     | 10.1-10.6              | 10.0-10.6     | 10.1-10.7              |
| VLDL cholesterol $\text{mmol/l}$       | 0.03-0.31     | 0.03-0.31     | 0.03-0.23              | 0.03-0.29     | 0.03-0.36              |
| LDL cholesterol $\text{mmol/l}$        | 0.16-2.35     | 0.28-2.27     | 0.30-2.24              | 0.28-2.21     | 0.28-2.85              |
| HDL cholesterol $\text{mmol/l}$        | 3.6-8.0       | 3.2-7.9       | 3.6-7.9                | 3.2-7.9       | 3.0-8.0                |
| Esterified cholesterol $\text{mmol/l}$ | 3.1-8.2       | 2.9-8.1       | 3.2-8.0                | 2.9-8.1       | 2.9-8.4                |
| Free cholesterol $\text{mmol/l}$       | 0.7-2.2       | 0.6-2.2       | 0.7-2.0                | 0.6-2.2       | 0.6-2.4                |
| VLDL triglycerides $\text{mmol/l}$     | 0.02-0.70     | 0.00-0.70     | 0.00-0.44              | 0.00-0.69     | 0.00-0.86              |
| LDL triglycerides $\text{mmol/l}$      | 0.13-0.30     | 0.13-0.31     | 0.15-0.33 <sup>a</sup> | 0.13-0.29     | 0.14-0.27              |
| HDL triglycerides $\text{mmol/l}$      | 0.01-0.08     | 0.00-0.08     | 0.00-0.04 <sup>b</sup> | 0.00-0.07     | 0.01-0.09 <sup>a</sup> |
| Glycoprotein acetyls $\mu\text{mol/l}$ | 532-964       | 597-1,028     | 611-996                | 596-1,005     | 605-1,129 <sup>a</sup> |
| Palmitic acid $\text{mmol/l}$          | 1.9-3.5       | 1.8-3.6       | 1.8-3.4                | 1.8-3.6       | 1.8-3.9                |
| Stearic acid $\text{mmol/l}$           | 1.9-3.8       | 1.7-3.8       | 1.8-3.7                | 1.7-3.9       | 1.7-4.0                |

|                                    |               |                      |                          |               |                      |
|------------------------------------|---------------|----------------------|--------------------------|---------------|----------------------|
| Oleic acid mmol/l                  | 1.1-2.5       | 1.3-2.8              | 1.3-2.5                  | 1.3-2.8       | 1.3-3.2 <sup>a</sup> |
| Linoleic acid mmol/l               | 2.7-5.7       | 2.5-5.9              | 2.5-5.1                  | 2.5-5.9       | 2.5-6.2              |
| Arachidonic acid mmol/l            | 1.6-3.7       | 1.4-3.6              | 1.5-3.7                  | 1.4-3.6       | 1.3-3.7              |
| Docosapentaenoic acid mmol/l       | 0.1-0.3       | 0.1-0.4              | 0.1-0.3                  | 0.1-0.4       | 0.1-0.4              |
| Docosahexaenoic acid mmol/l        | 0.1-0.9       | 0.1-0.7              | 0.1-0.8                  | 0.1-0.7       | 0.1-0.8              |
| Omega-3 fatty acids mmol/l         | 0.4-1.8       | 0.4-1.6              | 0.4-1.6                  | 0.4-1.6       | 0.5-1.8              |
| Omega-6 fatty acids mmol/l         | 4.5-9.6       | 4.1-9.8              | 4.2-9.3                  | 4.1-9.6       | 3.9-10.6             |
| Polyunsaturated fatty acids mmol/l | 5.2-10.8      | 4.7-11.1             | 4.8-10.6                 | 4.7-11.0      | 4.6-12.0             |
| Saturated fatty acids mmol/l       | 3.9-7.2       | 3.6-7.4              | 3.6-6.8                  | 3.6-7.5       | 3.5-7.7              |
| Total fatty acids mmol/l           | 10.5-20.4     | 9.7-21.0             | 9.8-20.0                 | 9.7-21.2      | 9.3-22.5             |
| Palmitic acid%                     | 15.9-19.8     | 16-20                | 16-19                    | 16-19         | 16-20                |
| Stearic acid%                      | 17.5-19.5     | 17.3-19.4            | 17.5-19.3                | 17.4-19.5     | 17.1-19.4            |
| Oleic acid%                        | 9.2-14.2      | 10.7-15.1            | 10.6-14.2 <sup>a</sup>   | 10.9-15.1     | 10.9-15.7            |
| Linoleic acid%                     | 23.9-29.4     | 24.1-28.6            | 23.3-27.5 <sup>a,b</sup> | 24.5-28.6     | 24.7-28.7            |
| Arachidonic acid%                  | 13.6-20.7     | 13.2-20.1            | 15.0-20.7 <sup>a,b</sup> | 13.1-19.9     | 12.7-19.2            |
| Docosapentaenoic acid%             | 0.9-1.9       | 1.1-2.0              | 1.1-1.9                  | 1.1-1.9       | 1.1-2.0              |
| Docosahexaenoic acid%              | 0.9-6.2       | 0.7-4.8 <sup>b</sup> | 1.0-5.2 <sup>b</sup>     | 0.7-4.7       | 0.6-5.0 <sup>a</sup> |
| Omega-3 fatty acids%               | 3-12          | 3-10                 | 3-11                     | 3-11          | 4-11                 |
| Omega-6 fatty acids%               | 43-49         | 42-48                | 42-48                    | 42-48         | 42-47                |
| Polyunsaturated fatty acids%       | 48-57         | 48-55                | 48-55 <sup>b</sup>       | 47-55         | 47-55                |
| Saturated fatty acids%             | 34-39         | 34-38                | 34-38                    | 34-38         | 33-38                |
| Omega-6/omega-3 fatty acids        | 3.5-16.3      | 4.2-13.4             | 4.1-13.5                 | 4.2-14.2      | 4.0-13.1             |
| XL-VLDL particles nmol/l           | 0-2           | 0-1                  | 0-1                      | 0-1           | 0-2                  |
| L-VLDL particles nmol/l            | 1-15          | 0-16                 | 0-11 <sup>a</sup>        | 0-15          | 0-19                 |
| S-VLDL particles nmol/l            | 11-38         | 10-39                | 13-34                    | 10-37         | 10-47                |
| L-LDL particles nmol/l             | 79-380        | 90-370               | 110-350                  | 91-380        | 83-400               |
| S-LDL particles nmol/l             | 89-1000       | 140-960              | 130-940                  | 130-920       | 140-1,100            |
| XL-HDL particles nmol/l            | 1-6,200       | 0-5,800              | 25-5,500                 | 0-5,800       | 1-6,000              |
| L-HDL particles nmol/l             | 21,000-34,000 | 20,000-34,000        | 20,000-34,000            | 19,000-35,000 | 18,000-34,000        |
| S-HDL particles nmol/l             | 11,000-19,000 | 11,000-20,000        | 11,000-19,000            | 11,000-20,000 | 10,000-20,000        |



|                                       |           |           |                     |           |                      |
|---------------------------------------|-----------|-----------|---------------------|-----------|----------------------|
| XL-VLDL lipids mmol/l                 | 0-0.3     | 0-0.3     | 0-0.2               | 0-0.2     | 0-0.4                |
| L-VLDL lipids mmol/l                  | 0-0.6     | 0-0.6     | 0-0.4 <sup>a</sup>  | 0-0.6     | 0-0.7                |
| S-VLDL lipids mmol/l                  | 0.1-0.4   | 0.1-0.4   | 0.1-0.3             | 0.1-0.3   | 0.1-0.4 <sup>a</sup> |
| L-LDL lipids mmol/l                   | 0.2-1.2   | 0.3-1.2   | 0.3-1.1             | 0.3-1.2   | 0.3-1.3              |
| S-LDL lipids mmol/l                   | 0.2-2.6   | 0.3-2.4   | 0.3-2.4             | 0.3-2.3   | 0.3-2.9              |
| XL-HDL lipids mmol/l                  | 0.6-5.2   | 0.6-5.0   | 0.6-4.7             | 0.6-5.0   | 0.7-5.2              |
| L-HDL lipids mmol/l                   | 5.4-8.1   | 5.0-8.3   | 5.0-8.1             | 4.9-8.3   | 4.8-8.3              |
| S-HDL lipids mmol/l                   | 1.3-2.1   | 1.3-2.2   | 1.3-2.1             | 1.3-2.2   | 1.1-2.2              |
| XL-VLDL cholesterol mmol/l            | 0-0.06    | 0-0.06    | 0-0.04              | 0-0.06    | 0-0.08               |
| L-VLDL cholesterol mmol/l             | 0-0.13    | 0-0.13    | 0-0.08              | 0-0.12    | 0-0.15               |
| S-VLDL cholesterol mmol/l             | 0.01-0.14 | 0.02-0.15 | 0.02-0.11           | 0.02-0.14 | 0.02-0.18            |
| L-LDL cholesterol mmol/l              | 0.03-0.70 | 0.07-0.68 | 0.11-0.61           | 0.07-0.68 | 0.07-0.76            |
| S-LDL cholesterol mmol/l              | 0.09-1.64 | 0.16-1.53 | 0.16-1.50           | 0.16-1.48 | 0.18-1.88            |
| XL-HDL cholesterol mmol/l             | 0.3-3.0   | 0.2-2.8   | 0.3-2.9             | 0.2-2.7   | 0.2-2.9              |
| L-HDL cholesterol mmol/l              | 2.6-4.3   | 2.3-4.4   | 2.5-4.3             | 2.3-4.5   | 2.2-4.4              |
| S-HDL cholesterol mmol/l              | 0.5-1.0   | 0.5-1.0   | 0.6-1.0             | 0.5-1.0   | 0.5-1.0              |
| XL-VLDL esterified cholesterol mmol/l | 0-0.03    | 0-0.03    | 0-0.02              | 0-0.03    | 0-0.03               |
| L-VLDL esterified cholesterol mmol/l  | 0-0.05    | 0-0.06    | 0-0.04              | 0-0.05    | 0-0.07               |
| S-VLDL esterified cholesterol mmol/l  | 0-0.09    | 0.01-0.09 | 0.01-0.08           | 0.01-0.09 | 0.01-0.11            |
| L-LDL esterified cholesterol mmol/l   | 0.01-0.51 | 0.03-0.49 | 0.05-0.43           | 0.02-0.48 | 0.02-0.55            |
| S-LDL esterified cholesterol mmol/l   | 0.05-1.14 | 0.10-1.09 | 0.10-1.06           | 0.10-1.06 | 0.12-1.35            |
| XL-HDL esterified cholesterol mmol/l  | 0.2-2.3   | 0.2-2.1   | 0.2-2.1             | 0.2-2.1   | 0.2-2.3              |
| L-HDL esterified cholesterol mmol/l   | 2.3-3.7   | 2.0-3.8   | 2.2-3.7             | 2.0-3.8   | 1.9-3.8              |
| S-HDL esterified cholesterol mmol/l   | 0.4-0.8   | 0.4-0.8   | 0.5-0.8             | 0.4-0.8   | 0.4-0.8              |
| XL-VLDL free cholesterol mmol/l       | 0-0.05    | 0-0.05    | 0-0.03              | 0-0.04    | 0-0.05               |
| L-VLDL free cholesterol mmol/l        | 0-0.08    | 0-0.08    | 0-0.05 <sup>a</sup> | 0-0.07    | 0-0.10               |
| S-VLDL free cholesterol mmol/l        | 0.01-0.05 | 0.01-0.06 | 0.01-0.05           | 0.01-0.05 | 0.01-0.07            |
| L-LDL free cholesterol mmol/l         | 0.03-0.20 | 0.04-0.20 | 0.05-0.18           | 0.04-0.20 | 0.04-0.21            |
| S-LDL free cholesterol mmol/l         | 0.04-0.48 | 0.05-0.45 | 0.06-0.45           | 0.05-0.43 | 0.05-0.53            |
| XL-HDL free cholesterol mmol/l        | 0.1-0.7   | 0.1-0.6   | 0.1-0.6             | 0.1-0.6   | 0.1-0.6              |
| L-HDL free cholesterol mmol/l         | 0.3-0.6   | 0.3-0.6   | 0.3-0.6             | 0.3-0.6   | 0.3-0.6              |
| S-HDL free cholesterol mmol/l         | 0.1-0.2   | 0.1-0.2   | 0.1-0.2             | 0.1-0.2   | 0.1-0.2              |

|                              |           |           |                          |           |                     |
|------------------------------|-----------|-----------|--------------------------|-----------|---------------------|
| XL-VLDL triglycerides mmol/l | 0-0.22    | 0-0.17    | 0-0.13                   | 0-0.17    | 0-0.24              |
| L-VLDL triglycerides mmol/l  | 0.01-0.41 | 0.01-0.42 | 0.00-0.27 <sup>b</sup>   | 0.01-0.39 | 0.01-0.49           |
| S-VLDL triglycerides mmol/l  | 0.03-0.16 | 0.02-0.16 | 0.02-0.13                | 0.01-0.15 | 0.02-0.19           |
| L-LDL triglycerides mmol/l   | 0.11-0.24 | 0.10-0.24 | 0.11-0.26 <sup>a,b</sup> | 0.09-0.23 | 0.10-0.22           |
| S-LDL triglycerides mmol/l   | 0.02-0.07 | 0.03-0.07 | 0.03-0.08                | 0.03-0.07 | 0.03-0.07           |
| XL-HDL triglycerides mmol/l  | 0-0.02    | 0-0.02    | 0-0.02                   | 0-0.02    | 0-0.03              |
| L-HDL triglycerides mmol/l   | 0.01-0.03 | 0-0.03    | 0-0.02                   | 0-0.03    | 0-0.04 <sup>a</sup> |
| S-HDL triglycerides mmol/l   | 0-0.04    | 0-0.03    | 0-0.02                   | 0-0.03    | 0-0.04              |
| XL-VLDL phospholipids mmol/l | 0-0.05    | 0-0.05    | 0-0.04                   | 0-0.05    | 0-0.09              |
| L-VLDL phospholipids mmol/l  | 0-0.09    | 0-0.11    | 0-0.06                   | 0-0.10    | 0-0.15              |
| S-VLDL phospholipids mmol/l  | 0.01-0.07 | 0.01-0.08 | 0.01-0.06                | 0-0.08    | 0.01-0.10           |
| L-LDL phospholipids mmol/l   | 0.08-0.33 | 0.08-0.32 | 0.09-0.33                | 0.07-0.30 | 0.08-0.35           |
| S-LDL phospholipids mmol/l   | 0.08-0.87 | 0.12-0.84 | 0.12-0.80                | 0.12-0.80 | 0.12-1.01           |
| XL-HDL phospholipids mmol/l  | 0.35-2.27 | 0.33-2.22 | 0.32-1.97                | 0.30-2.21 | 0.34-2.37           |
| L-HDL phospholipids mmol/l   | 2.65-3.92 | 2.48-3.94 | 2.61-3.79                | 2.44-3.95 | 2.56-4.01           |
| S-HDL phospholipids mmol/l   | 0.74-1.18 | 0.72-1.19 | 0.76-1.14 <sup>a</sup>   | 0.72-1.19 | 0.67-1.21           |

107 HP all dogs n = 269, S all dogs n =865, S puppy n =152, S adult n =545, S senior n =168.

108 HP: heparinized plasma

109 S: serum

110 BCAA: Branched-chain amino acids

111 <sup>a</sup>: no overlap between the 90% CI of the upper reference limit of this age group compared to adult dogs

112 <sup>b</sup>: no overlap between the 90% CI of the lower reference limit of this age group compared to adult dogs

113

#### 114 **Precision of the platform**

115 We studied analysis precision using three biologically different dogs, with duplicate aliquots of each dog's sample

116 analyzed once a day during a twenty-day period (Supplementary Table 3). The aliquots from a senior dog suffering

117 from hyperadrenocorticism showed marked chylomicronemia, and was excluded from method precision estimations.

118 Outlier removal slightly affected result interpretation, thus results were evaluated with outliers removed. In the

119 primarily evaluated (non-chylomicronemic) samples, 110/123 biomarkers reached all of their precision goals. Albumin

120 did not reach its primary precision goal of ASVCP CV<sub>min</sub> based on biological variation, but reached all its other

121 precision goals; CV% goal based on ASVCP Clinical Decision Limits and the S<sub>T</sub> goal of under 1/8 reference width

122 ( $S_{Tmax}$ ). Histidine, acetate, phenylalanine/tyrosine and BCAA/tyrosine met their primary precision goal of CV% under  
123 20% ( $CV_{maxBG}$ ), but did not meet their secondary precision goal of  $S_{Tmax}$ . 12/123 biomarkers did not reach their primary  
124 precision goal of  $CV_{maxBG}$ , but reached the  $S_{Tmax}$  goal. All of these analytes were lipid analytes with high inter-  
125 individual biological variation and large reference interval width, and were in low concentrations in the tested samples.  
126 The  $CV_{maxBG}$  goal was thus regarded inappropriate for these analytes, since the variation in these analytes'  
127 concentrations was not considered to affect clinical decision-making.

128 Chylomicronemia caused imprecision in multiple lipid measurements as well as in creatinine and the amino acids  
129 leucine and phenylalanine. Precision of glutamine was non-evaluable, since the olefin oligomer gel in the sample tubes  
130 inhibited correct glutamine estimation from the NMR signal. The precision of XL-VLDL phospholipids was non-  
131 evaluable due to a large amount of missing observations caused by physiologically very low analyte concentrations in  
132 healthy dogs.

### 133 **The effect of sample storage on biomarker stability**

134 All evaluated analytes remained stable in refrigerated temperature for 7 days (Table 2, Supplementary Table 4). Most of  
135 the analytes remained also stable at room temperature for 7 days. Unstable metabolites in room temperature were the  
136 amino acids histidine, isoleucine, glutamine, tyrosine and phenylalanine, acetate, triglycerides and certain lipoprotein  
137 particle constituent concentrations as well as the fatty acid docosapentaenoic acid. The stability of all other amino acids  
138 than glutamine was better in EDTA-plasma than in serum. Glutamine concentration changed significantly at 4 days of  
139 storage at room temperature in EDTA-plasma samples and at 7 days of storage in serum samples. The acceptable  
140 change limit (ACL) of glutamine and XL-VLDL phospholipids could not be calculated using the analysis mean  
141 coefficient of variation (CVa), since these were not available from the precision study. The changes observed in  
142 triglyceride concentrations at room temperature originate from the computational quantitation based on lipoprotein  
143 particle distribution and the lipid quantity in the lipoprotein particle core and their outer surface. These are slightly  
144 affected by sample storage at room temperature, thus affecting triglyceride quantitation.

145 All of the evaluated analytes were stable at -80°C for 12 months. Storage at -20°C affected certain lipoprotein particles  
146 and their composition, certain fatty acids, citrate, acetate and GlycA. Citrate levels were significantly ( $p < 0.05$ )  
147 changed already at one week of storage at -20°C.

148 Heparin plasma storage samples rarely made under the p-value of 0.05, even when the mean percentage deviation  
149 (MPD) exceeded the ACL and statistically significant ( $p < 0.05$ ) changes were noted in other sample types.

150 Outlier removal slightly affected result interpretation in serum and EDTA plasma, thus their results were evaluated after  
 151 outlier removal. In heparin plasma, outliers could not be reliably identified due to the small sample size (n = 4).  
 152 Table 2. Critical storage times for analytes sensitive to certain storage conditions in at least one sample type.

| Analyte               | Temperature | Storage time <sub>Serum</sub> (p)              | Storage time <sub>EDTA</sub> (p)             | Storage time <sub>HP</sub> (p)   |
|-----------------------|-------------|------------------------------------------------|----------------------------------------------|----------------------------------|
| Glutamine             | RT          | <b>7 days<sup>a</sup> (0.00<sup>*</sup>)</b>   | <b>4 days<sup>a</sup> (0.04<sup>*</sup>)</b> | <b>4 days<sup>a</sup> (0.11)</b> |
| Histidine             | RT          | <b>3 days (0.00<sup>*</sup>)</b>               | NO                                           | <b>3 days (0.03<sup>*</sup>)</b> |
| Isoleucine            | RT          | <b>2 days (0.04<sup>*</sup>)</b>               | NO                                           | 4 days (0.20)                    |
| Phenylalanine         | RT          | <b>3 days (0.00<sup>*</sup>)</b>               | NO                                           | 7 days (0.06)                    |
| Tyrosine              | RT          | <b>3 days (0.01<sup>*</sup>)</b>               | NO                                           | NO                               |
| HDL triglycerides     | RT          | <b>2 days (0.01<sup>*</sup>)</b>               | 4 days (0.07)                                | 4 days (0.20)                    |
| LDL triglycerides     | RT          | <b>2 days (0.01<sup>*</sup>)</b>               | <b>4 days (0.02<sup>*</sup>)</b>             | 2 days (0.20)                    |
| VLDL triglycerides    | RT          | <b>2 days (0.00<sup>*</sup>)</b>               | <b>2 days (0.04<sup>*</sup>)</b>             | 4 days (0.11)                    |
| Triglycerides         | RT          | <b>24 hours (0.04<sup>*</sup>)</b>             | <b>2 days (0.02<sup>*</sup>)</b>             | 2 days (0.20)                    |
| Acetate               | RT          | <b>4 days (0.02<sup>*</sup>)</b>               | <b>7 days (0.00<sup>*</sup>)</b>             | <b>4 days (0.03<sup>*</sup>)</b> |
| Docosapentaenoic acid | RT          | <b>7 days (0.03<sup>*</sup>)</b>               | NE                                           | 7 days (0.20)                    |
| Citrate               | -20°C       | <b>1 week (0.00<sup>*</sup>)</b>               | NO                                           | -                                |
| Acetate               | -20°C       | <b>3 months (0.00<sup>*</sup>)<sup>b</sup></b> | <b>6 months (0.00<sup>*</sup>)</b>           | -                                |
| Glycoprotein acetyls  | -20°C       | <b>1 month (0.00<sup>*</sup>)</b>              | <b>1 month (0.01<sup>*</sup>)</b>            | -                                |
| Omega-3 fatty acids   | -20°C       | <b>6 months (0.02<sup>*</sup>)</b>             | NE                                           | -                                |
| HDL particle size     | -20°C       | <b>3 months (0.04<sup>*</sup>)</b>             | <b>3 months (0.03<sup>*</sup>)</b>           | -                                |
| HDL particles         | -20°C       | <b>6 months (0.00<sup>*</sup>)</b>             | <b>6 months (0.00<sup>*</sup>)</b>           | -                                |
| LDL lipids            | -20°C       | NE                                             | <b>6 months (0.03<sup>*</sup>)</b>           | -                                |
| LDL particles         | -20°C       | NE                                             | <b>6 months (0.03<sup>*</sup>)</b>           | -                                |
| LDL cholesterol       | -20°C       | NE                                             | <b>6 months (0.03<sup>*</sup>)</b>           | -                                |
| VLDL particles        | -20°C       | <b>6 months (0.04<sup>*</sup>)</b>             | <b>6 months (0.01<sup>*</sup>)</b>           | -                                |

153 The storage time presented in the table represents the time point, where statistically significant changes (two-sided  
 154 Wilcoxon exact test  $p < 0.05$ ), with a mean percentage deviation (MPD) exceeding the acceptable change limit (ACL)  
 155 are first observed. In sample types where statistical significance was not observed ( $p \geq 0.05$ ), the storage times represent  
 156 the time point, where the MPD first exceeds the ACL. This table includes only primary analytes. Lipoprotein particle  
 157 subclasses are not included. Stability at -20°C and -80°C were not studied in heparin plasma.  $n_{\text{serum}} = 7$ ,  $n_{\text{EDTA}} = 7$ ,  $n_{\text{HP}} =$   
 158 4.  
 159

160 RT: room temperature

161 \*:  $p < 0.05$

162 NO: no change observed

163 NE: not evaluable due to discrepancies in p-values and MPD vs ACL. Results in other sample types should be consulted  
164 until further studies are conducted.

165 <sup>a</sup> ACL unknown, evaluated only as  $p < 0.05$ , time in heparin plasma represents the time, where a change in similar  
166 magnitude as in serum and EDTA plasma is observed

167 <sup>b</sup> At 6 months of storage, MPD returned below the ACL and  $p > 0.05$

### 168 **The effect of delayed plasma separation on biomarker stability**

169 We studied the effect of delayed plasma separation in 34 EDTA plasma samples, which had been stored as whole blood  
170 in the refrigerator for 24 and 48 hours before separating plasma (Supplementary Table 5, table 3). Outlier removal  
171 slightly affected result interpretation, thus the results were evaluated after outlier removal. Prolonged contact with red  
172 blood cells (RBC) affected the concentration of many of the analytes. Significant changes ( $p < 0.05$ ,  $MPD > ACL$ ) after  
173 one day's contact to RBCs in refrigerator temperature were observed for glucose and lactate. After two days' contact  
174 with RBCs, significant changes were observed for citrate, amino acids alanine, histidine, isoleucine, leucine, valine,  
175 phenylalanine and tyrosine, cholesterol, triglycerides, and lipoprotein particles and their constituents. Glutamine values  
176 were also changed significantly ( $p < 0.05$ ) at 48 hours of storage as whole blood, but MPD could not be evaluated  
177 against the ACL due to the missing ACL.

178 Table 3. Critical storage times as whole blood for analytes sensitive to storage as whole blood.

| Analyte       | Storage time (p)             |
|---------------|------------------------------|
| Glucose       | 24 hours (0.00)              |
| Lactate       | 24 hours (0.00)              |
| Citrate       | 48 hours (0.00)              |
| Alanine       | 48 hours (0.00)              |
| Glutamine     | 48 hours <sup>a</sup> (0.00) |
| Histidine     | 48 hours (0.00)              |
| Isoleucine    | 48 hours (0.00)              |
| Leucine       | 48 hours (0.01)              |
| Valine        | 48 hours (0.00)              |
| Phenylalanine | 48 hours (0.00)              |

|                        |                 |
|------------------------|-----------------|
| Tyrosine               | 48 hours (0.00) |
| HDL lipids             | 48 hours (0.03) |
| HDL particles          | 48 hours (0.00) |
| LDL diameter           | 48 hours (0.00) |
| VLDL diameter          | 48 hours (0.04) |
| Cholesterol            | 48 hours (0.02) |
| HDL cholesterol        | 48 hours (0.00) |
| Esterified cholesterol | 48 hours (0.00) |
| Triglycerides          | 48 hours (0.00) |
| VLDL triglycerides     | 48 hours (0.00) |

179 The storage time presented in the table represents the time point, where statistically significant changes (two-sided  
180 Wilcoxon exact test  $p < 0.05$ ) together with a mean percentage deviation (MPD) exceeding the acceptable change limit  
181 (ACL) are first observed.  $n = 34$ . This table includes only primary analytes. Lipoprotein particle subclasses are not  
182 included.

183  
184 <sup>a</sup> ACL unknown

185

#### 186 **Sample tube validation**

187 We studied the differences of seven different sample tubes and the variability between their two sample lots using  
188 samples from 20 client-owned dogs (Supplementary Table 6). Outlier removal did not affect result interpretation, thus  
189 results were evaluated without outlier removal.

190 Firstly, the different sample tubes were compared to the primary reference tube (Vacuette Lithium Heparin). Most  
191 analytes showed comparable results in all tube types compared to the primary reference tube. Significant differences ( $p$   
192  $< 0.05$ ) with  $MPD > ACL$  were noted for citrate, glucose, lactate and GlycA and significant differences ( $p < 0.05$ ) with  
193  $MPD < ACL$  were observed for glutamine, histidine, pyruvate and acetate. Glutamine showed significant differences ( $p$   
194  $< 0.05$ ) compared to the primary reference tube, but its ACL was not available. Most of this variability was observed  
195 between analyte values in serum and plasma.

196 Secondly, analyte values in all serum tubes were compared to the reference serum tube (Vacuette Z Serum Clot  
197 Activator). All serum tubes showed comparable results with the serum reference tube for all metabolites.

198 The only lot-to-lot variability was observed in MiniCollect Serum gel tubes for glutamine and GlycA. Results obtained  
199 by both of these tube lots were still comparable to the reference serum tube (Vacuette Z Serum Clot Activator). In these

200 MiniCollect Serum gel tubes, the two lots represented tubes of old-type (lot A) and new-type (lot B) tubes, with the tube  
201 having undergone changes in physical appearance, while sample tube constituents had remained the same.

### 202 **Interference studies**

203 We studied the interference of hemolysis, lipemia, and unconjugated and conjugated bilirubin using triplicate samples  
204 of two different test pools for hemolysis and bilirubinemia and from one pool for lipemia (Supplementary Table 7).  
205 Hemolysis interfered with the quantitation of albumin and certain lipids; lipoprotein particle cholesterol concentrations,  
206 total triglycerides and certain lipoprotein triglyceride measures, multiple fatty acids, LDL and VLDL particle size,  
207 certain lipoprotein particle concentrations, lipoprotein phospholipids and certain lipoprotein lipids. Bilirubinemia  
208 interfered only with the quantitation of L-VLDL esterified cholesterol and S-HDL triglycerides. Lipemia affected the  
209 quantitation of GlycA due to the lipid contribution to the GlycA signal. However, the concentration of GlycA remained  
210 above the reference interval after the removal of lipids, indicating that lipemia was not the sole cause for raised GlycA  
211 concentration in the lipemic pool.

### 212 **Method comparison**

213 Using 999 clinical canine samples, we evaluated, whether results of routine clinical chemistry analytes in the NMR  
214 metabolomics platform are comparable with results obtained by conventional clinical chemistry methods  
215 (Supplementary Table 8). The tested metabolites were glucose, lactate, creatinine, albumin, cholesterol and  
216 triglycerides. The tested samples covered the clinical concentration ranges for all analytes. The comparison plots  
217 showed satisfactory agreement between the two methods for all analytes. In some metabolites, logarithm transformation  
218 showed better agreement than initial data, suggesting better agreement in the transformed data.

219

220 Glucose, lactate and albumin measurements reached the Total Allowable Error ( $TE_a$ ) goals based on ASVCP Clinical  
221 Decision limits<sup>41</sup>, indicating that the two methods can be used interchangeably without affecting clinical decision-  
222 making. The bias percentage of creatinine, cholesterol and triglycerides was too high for the analytes to reach the  $TE_a$   
223 goals based on Clinical Decision limits, meaning that the two methods cannot be used interchangeably. Values obtained  
224 by the conventional method can be evaluated against values obtained by the NMR method using the slope and intercept  
225 calculated by Deming regression.

### 226 **Hyperglycemia associates with many metabolic changes**

227 We evaluated the practical relevance of the NMR metabolomics platform by comparing the metabolic profile of a  
228 markedly hyperglycemic group ( $n = 24$ ) to a normoglycemic group of routine laboratory diagnostic samples ( $n = 781$ ).  
229 Several biomarkers with previously reported changes in canine and human diabetes mellitus were significantly changed

230 (p < 0.05) in the hyperglycemic group, including the BCAAs isoleucine, leucine and valine, GlycA, acetate, fatty acids,  
231 cholesterol, triglycerides, lipoprotein particle concentrations and composition, phenylalanine and lactate  
232 (Supplementary Table 9).

233 Excellent fit in logistic regression modeling (smallest AICs and AUC values > 0.9), indicating good predictive value for  
234 hyperglycemia, was observed for BCAAs and their ratios. Twenty metabolites had good fit (AUC < 0.8). 31 biomarkers  
235 had a high proportion of missing values, reducing the comparability with other metabolites due to different sample  
236 populations. There were 14 metabolites with good fit among these metabolites. Many of these metabolites are lipids,  
237 that have very low concentrations in healthy dogs, causing a high proportion of automatically rejected very low values  
238 by platform quality control.

239

## 240 **Discussion**

241 Metabolomics is a rapidly growing field holding great potential for numerous clinical and scientific applications.  
242 Amongst various approaches, NMR spectroscopy is currently the most promising metabolomics method for clinical use  
243 due to its' quantitative nature, high-throughput, accuracy and speed, all of which are currently not achievable with MS  
244 based metabolomics. In this study, we describe a novel, cost-effective NMR metabolomics testing platform for dogs. A  
245 similar approach has previously been demonstrated and widely utilized in human metabolomics<sup>40</sup>. The testing platform  
246 is capable of quantifying 123 biomarkers from a 100 µl sample of serum, heparin plasma, EDTA plasma or citrate  
247 plasma. The throughput for one device is ~200 samples per 24 hours and around 70,000 samples per year. The  
248 turnaround time is currently 5 days and can be markedly reduced. These characteristics make this comprehensive  
249 metabolomics platform a new high-throughput method to facilitate veterinary research and clinical diagnostics with  
250 significant implications on treatment, care and well-being of dogs.

251 Recent advances in metabolomics research are paving the way from diagnostics based on single biomarkers to a more  
252 holistic approach. Especially the management of chronic metabolic diseases is thought to benefit from a methodology  
253 capable of generating comprehensive information on the metabolic state of the individual, enabling a personalized  
254 approach to management of the disease<sup>34</sup>. Metabolomics is also proving itself valuable in disease risk prediction<sup>33,42-44</sup>.

255 In contrast to genetics, metabolomics offers real-time information of the metabolic state of the animal, taking  
256 environmental factors and treatment into account. This offers metabolomics the possibility to be utilized as both a  
257 diagnostic tool as well as a follow-up tool. The advantage of the holistic nature of the NMR metabolomics platform was  
258 demonstrated in the comparison of hyperglycemic samples to normoglycemic samples from a routine laboratory



259 diagnostic sample population. The NMR metabolomics platform was able to identify a plethora of biomarkers with  
260 significant differences between the hyperglycemic group and the normoglycemic group, including BCAAs, GlycA,  
261 acetate, fatty acids, cholesterol, triglycerides and lipoprotein particle concentrations and composition, phenylalanine and  
262 lactate. Many of these changes have been associated with canine and human diabetes mellitus, and even diabetes risk  
263 before disease onset<sup>16,25,34,42,44</sup>. This suggests the possibility of the NMR metabolomics platform to enhance preventative  
264 and precision veterinary medicine by providing new therapeutic targets and prognostic diagnostic markers.

265 In addition to a set of well-known clinical chemistry analytes, the established metabolomics platform includes a wide  
266 range of previously clinically unquantified biomarkers. One of the most interesting novel biomarkers is GlycA, a  
267 composite systemic inflammatory biomarker comprised of signals of acute-phase proteins  $\alpha$ 1-acid glycoprotein,  
268 haptoglobin,  $\alpha$ 1-antitrypsin,  $\alpha$ 1-antichymotrypsin, and transferrin, with a slight contribution of glycosylated  
269 apolipoproteins<sup>45</sup>. In humans, GlycA has been linked with systemic inflammation, cardiovascular disease risk, diabetes  
270 mellitus, pregnancy, severe infection and all-cause mortality<sup>28,45-49</sup>. GlycA was also changed in our hyperglycemic  
271 group.

272 Formation of reference intervals is an important prerequisite for the clinical use of new laboratory method. We  
273 established reference intervals for 123 analytes, most of which are previously unpublished. The reference intervals  
274 differed between puppies, adult and senior dogs for many of the analytes, confirming substantial metabolic changes  
275 occurring during the maturation of the individual<sup>50-53</sup>. The higher reference limit of GlycA in senior than adult dogs  
276 suggests a higher prevalence of subclinical disease in older animals. The sample tube validation study demonstrated,  
277 that reference intervals created for the same sample type should be used in interpretation of the results. It should also be  
278 noted, that glycine and pyruvate cannot be quantified from EDTA plasma, and glutamine is not quantifiable from  
279 oligofin oligomer gel tubes.

280 Clinical use of a new laboratory method requires excellent method precision. The precision study suggested, that the  
281 precision of the NMR metabolomics platform is generally outstanding. For histidine, acetate, phenylalanine/tyrosine  
282 and BCAA/tyrosine, further studies in diseased animals are needed to conclude, whether measurement imprecision  
283 affects clinical utilization of these analytes.

284 The analytical method should be considered when evaluating laboratory results against treatment guidelines and  
285 reference intervals<sup>39</sup>. The method comparison study revealed a linear relationship between the conventional and NMR  
286 method for all analytes, but all results cannot be evaluated interchangeably. Triglyceride measurements showed most  
287 variability between the two methods, explained by differences in methodology, sample handling and biological

288 characteristics. Analysis with the conventional method was done immediately, whereas NMR aliquots were frozen and  
289 one batch partly thawed during shipment. The methodology is also different, NMR measures triglycerides within  
290 lipoprotein particles, whereas the conventional method is based on interaction with the triglyceride molecule. Lipemia  
291 also affects the precision of triglyceride analyses, which causes more variability in high analyte concentrations.

292 Correct preanalytical measures are considered essential for the integrity of laboratory results<sup>54,55</sup>. An appropriate sample  
293 drawing technique is crucial for avoiding hemolysis, fasting before sample drawing for avoiding lipemia and prompt  
294 RBC separation for avoidance of prolonged RBC metabolism. Hemolysis, bilirubinemia, lipemia and prolonged contact  
295 with RBC all affected the quantification of certain metabolites. The profound impact of chylomicronemia on method  
296 precision was caused by matrix heterogeneity due to the chylomicron cream layer formation, which could be reduced by  
297 sample mixing immediately before analysis. Glycolysis-related metabolites are especially sensitive to contact with  
298 RBC, causing plasma samples to have different concentrations of these analytes than serum samples. Prolonged contact  
299 to RBCs affected also amino acids, which might explain why amino acid stability was better in our storage study using  
300 plasma and serum samples, than in previous studies using whole blood<sup>56,57</sup>.

301 It is critical to use sample storage and shipping conditions that preserve the integrity of laboratory results. All tested  
302 analytes were stable at refrigerator temperature for one week, making refrigerated temperature the optimal sample  
303 short-term storage and shipping temperature. Sample storage at room temperature should be minimized. Most amino  
304 were more stable in EDTA-plasma samples than in serum samples in room temperature, which has also been reported in  
305 previous studies<sup>57</sup>. The gold standard for long-term storage of serum/plasma metabolomics samples is freezing the  
306 samples immediately after serum/plasma separation and keeping them frozen at -80°C until analysis and avoiding  
307 additional freeze-thaw cycles<sup>58</sup>. All of the tested analytes remained stable during one year of storage at -80°C. Two  
308 weeks of storage in -20°C was suitable for most of the analytes.

309 Limitations of this study include, that the precision and interference studies did not include samples at clinical decision  
310 levels for all metabolites. Since the NMR platform is so extensive, acquiring these samples would have been extremely  
311 difficult. The sample numbers especially in heparin plasma, were a limitation of the storage study. Limitations of the  
312 method comparison study include lack of a reference method generating results that could be viewed as true values of  
313 the analyte. No clinical data was available for the hyperglycemia study, thus the study should be repeated with samples  
314 in confirmed diabetic animals. The identified analytes should also be studied for multicollinearity.

315 Owing to the advantages of quantitative results, high throughput and reproducibility, the NMR-based metabolomic  
316 platform developed and validated here holds great potential for numerous clinical and research applications in

317 veterinary medicine. The performance of the NMR testing platform is generally outstanding and typical blood drawing  
318 and processing guidelines ensure the integrity of the results. The diagnostic power of the established metabolomics  
319 panel comes from the wide representation of markers from various molecular groups, including amino acids, fatty acids,  
320 glycolysis-related metabolites and lipoproteins. This enables efficient monitoring of physiologic changes in health and  
321 disease by the identification of condition-specific metabolic fingerprints.

322

## 323 **Materials and Methods**

### 324 **Proton NMR spectroscopy**

325 Metabolic profiling was conducted using a proton nuclear magnetic resonance (NMR) metabolomics technique similar  
326 to what has been demonstrated for human samples in Soininen et al.<sup>40</sup>. The fully automated process is capable of  
327 quantifying 200 samples per 24 hours and the throughput for one device is around 70,000 samples per year. Usable  
328 sample types are serum, EDTA-plasma, heparin plasma and citrate plasma. Since the concentration of the tested  
329 molecule is in a linear relationship with NMR signal intensity, the linearity of NMR results is considered inherently  
330 outstanding.

331 The NMR testing method was calibrated by firstly collecting 1008 canine EDTA-plasma samples and 120 serum  
332 samples from client-owned dogs and running the samples with NMR. Only samples with plasma/serum separation done  
333 within one day of sample collection were used for initial method calibration, resulting in 847 EDTA-plasma samples  
334 and all 120 serum samples. The characteristic NMR signals of amino acids, glycolysis related metabolites, creatinine,  
335 and GlycA are well-known, and the quantitative and linear relationship between the signal intensity and molecular  
336 concentration is an inherent property of NMR. Thus, these biomarkers can be quantified using the established NMR  
337 techniques. The identification of signals for triglycerides, cholesterol, and lipoprotein subclass particles and lipids was  
338 verified by analyzing 200 of the previously collected EDTA-plasma samples with different lipid concentrations by high-  
339 performance liquid chromatography<sup>59</sup>. For these measures, the concentration range of the automated NMR spectral  
340 analysis was also calibrated against these results.

341 Once the initial method calibration was completed, we collected a total of 4683 serum and 495 lithium heparin plasma  
342 samples across Finland during fall 2017-fall 2018 for use in our canine NMR metabolomics project. Samples were  
343 collected from dogs of all available breeds, with an emphasis of including dogs from genetically and morphologically  
344 different breed groups. Samples were drawn by cephalic venipuncture from client-owned dogs. Serum samples were  
345 collected into MiniCollect serum gel tubes and were allowed to clot for 30-45 minutes before centrifuging them at 3,000

346 x g for 10 minutes to separate the serum. Heparin plasma samples were collected into MiniCollect lithium heparin  
347 plasma gel tubes and the samples were immediately centrifuged at 3,000 x g for 10 minutes to separate plasma. All  
348 samples were then stored at -80°C before NMR analysis. All dog owners completed a history form, that included  
349 signalment and details about the health status, diet, exercise, stress and reproductive state of the dog.

350 The fatty acid panel verification and calibration was done using 100 samples with different lipid concentrations,  
351 collected for the canine NMR metabolomics project. Reference fatty acid concentrations were obtained using a  
352 chromatographical method by a commercial laboratory (Vitas as, Norway).

### 353 **Reference intervals**

354 Determination of reference intervals (RI) of healthy dogs was performed according to the American College of  
355 Veterinary Clinical Pathology (ASVCP) reference interval guidelines<sup>39</sup>. We used the population-based nonparametric  
356 method for RI calculation, and calculated 90% confidence intervals (CI) for the reference limits. A minimum of 120  
357 samples is required for the use of this method. Inclusion in RI calculation was based on fasting duration (minimum of  
358 12 hours), appropriate sample handling, and the lack of owner-reported biological confounding factors, including  
359 diseases, severe anxiety/stress and strenuous exercise before blood collection.

360 A total of 865 samples collected for the canine NMR metabolomics project were included in the serum RI calculations.  
361 The samples were chosen to include over 120 samples of puppies (under 1 year old), adults (1-7 years old) and senior  
362 dogs (over 7 years old), to be able to calculate age-specific reference ranges. The 865 samples consisted of individuals  
363 from 68 breeds, 347 males and 517 females, 152 puppies, 545 adult dogs and 168 senior dogs.

364 A total of 269 samples out of the initial 495 samples collected for the canine NMR metabolomics project were qualified  
365 for lithium heparin plasma RI calculations. They consisted of individuals from 83 breeds, 155 males and 114 females,  
366 29 puppies, 196 adult dogs and 44 senior dogs. Age-specific RI could be calculated for adult dogs.

367 Each metabolite was examined for outliers before RI calculation. We used Box Cox transformation to find a normal  
368 transformation, and Horn's algorithm in the transformed data to identify the outliers. In Horn's algorithm, the criterion  
369 for rejection of values is exceeding interquartile (IQ) fences set at  $Q1 - 1.5 \cdot IQR$  and  $Q3 + 1.5 \cdot IQR$  (IQR = interquartile  
370 range;  $IQR = IQ3 - IQ1$  where IQ1 and IQ3 are the 25th and 75th percentiles, respectively. Once we identified the  
371 outliers, the sample and animal data were thoroughly reviewed for confounding analytical and preanalytical factors  
372 before reaching a conclusion about sample exclusion. In metabolites, in which normal distribution was not found,  
373 Horn's algorithm offered multiple outliers, which all were reviewed before reaching a conclusion about exclusion.

374 After calculating the RIs and the 90% CIs for lower and upper reference limits, we studied the relation between 90%  
375 CIs and RI. It is recommended that CI should not exceed 0.2 times the width of the RI, since it may indicate, that the  
376 sample number is insufficient.

377 Differences between RI for different age groups were evaluated by comparing the 90% CI of reference limits of puppies  
378 and senior dogs to the 90% CI of reference limits of adult dogs. Differences in the reference limits were concluded to be  
379 present, when there was no overlap between the 90% CI of reference limits between the two groups.

### 380 **Precision**

381 Precision of the NMR method was tested using three biologically different dogs (puppy, healthy adult, senior dog  
382 suffering from hyperadrenocorticism). Blood was drawn by cephalic venipuncture into Vacuette 8ml Z Serum Sep Clot  
383 Activator tubes. Samples were allowed to clot for 30-45 minutes and centrifuged at 2,000 x g for 10 minutes to separate  
384 serum. Every sample was divided into 40 aliquots of 100 $\mu$ l. All samples were stored at -80°C before NMR analysis.  
385 Two duplicate aliquots of each sample were analyzed each day during a twenty-day time period.

386 The sample from the senior dog suffering from hyperadrenocorticism had marked chylomicronemia with a chylomicron  
387 coat forming on the top of the stored serum aliquots. The results of this sample were used to determine the effect of  
388 chylomicronemia on test precision.

389 Total within-laboratory precision estimates were expressed both as coefficient of variation (CV%) and standard  
390 deviation ( $S_T$ ). These within-laboratory precision estimates were evaluated against laboratory precision goals. We also  
391 calculated within-run precision, expressed as within-run standard deviation ( $S_r$ ). All precision estimates were calculated  
392 using methods described in CLSI EP5-A3<sup>60</sup>. Outlier detection was based on comparison of the absolute difference of  
393 the two duplicate aliquots analyzed in the same run to the mean absolute difference of all duplicates from the same  
394 sample. A difference that exceeded the mean absolute difference fourfold was set as the rejection line. If an outlier was  
395 detected, the duplicate was excluded from the calculations.

396 The currently most advisable hierarchy for performance specifications for human diagnostic laboratories is: 1.  
397 biological outcomes, 2. biological variation and 3. state-of-the-art<sup>61,62</sup>. Biological outcome-based performance goals  
398 cannot be used in veterinary medicine, since they have not yet been published for animals. Canine CV% goals based on  
399 biological variation are available for only a few analytes and can be so strict, that they are unachievable by clinical  
400 laboratories and do not affect interpretation of the results<sup>41</sup>. State-of-the-art goals can lack accuracy and might not fit all  
401 analytes. Due to the lack of specific performance goals for all analytes, we evaluated the precision results against a set  
402 of performance goals.

403 In this study, ASVCP goals based on biological variation were set as the primary goals for CV%, since they are the only  
404 canine-specific precision goals available<sup>41</sup>. The total accuracy of veterinary laboratory results is typically evaluated  
405 using Observed Total Error (TE<sub>obs</sub>) and evaluating it against against preset Total Allowable Error (TE<sub>a</sub>) limits. TE<sub>obs</sub> can  
406 be calculated as TE<sub>obs</sub> = Bias% + 2CV%. Bias was not applicable for this study as a deviation from a true value<sup>41</sup>. This  
407 led us to use ½ of ASVCP TE<sub>a</sub> limits based on Clinical Decision Limits as our secondary precision goals for CV%. If  
408 ASVCP goals were not set, we used 20% as the goal for CV% (CV<sub>maxBG</sub>), which is generally considered an acceptable  
409 laboratory error in metabolomics<sup>63,64</sup>. Since individual CV% max goals were not available for most of the analytes and  
410 the 20% CV% goal might not be descriptive enough for metabolites that have a very wide or narrow reference range  
411 due to inter-individual biological variation, we additionally compared the S<sub>T</sub> to the S<sub>Tmax</sub> goal of 1/8 of the width of the  
412 reference range. This goal was based on the finding, that analytical variation over one quarter of the reference range is  
413 considered to affect the clinical interpretation of the results<sup>65</sup>. The S<sub>Tmax</sub> goals based on 1/8 of the reference range width  
414 were very descriptive of the effects of imprecision on clinical interpretation of the results, but have the drawback, that  
415 imprecision affects the width of the reference range, itself<sup>66</sup>.

#### 416 **Sample storage study**

417 To define the effects of sample storage and shipping conditions on analyte results, we studied the effects of both long-  
418 and short-term sample storage. Short-term storage was studied in room temperature and refrigerated temperature, and  
419 long-term storage at -20°C and -80°C. To define storage effects in different sample matrices, we used three different  
420 sample matrices: serum, EDTA-plasma and heparin plasma. The protocol of the sample storage study is presented in  
421 Table 4.

422 To study storage effects in these above-mentioned sample matrices, we took serum and EDTA plasma samples of seven  
423 client-owned dogs in a separate sampling situation, and heparin plasma samples of four dogs in another sampling  
424 situation.

425 During the sample collection of EDTA plasma and serum samples for the storage study, blood was drawn by cephalic  
426 venipuncture into Vacuette serum gel tubes and Vacuette EDTA K2 tubes. Samples were centrifuged and separated  
427 according to the tube manufacturers' recommendations. EDTA-plasma samples were immediately centrifuged and  
428 plasma separated. Serum samples were allowed to clot for 30-45 minutes before centrifuging to separate serum.

429 Separated plasma and serum were divided into 24 aliquots and stored in conditions outlined in Table 1 before  
430 immediate analysis with proton NMR spectroscopy.

431 Heparin plasma samples for the storage study were collected by drawing blood by cephalic venipuncture into Vacuette  
 432 Lithium Heparin tubes. Samples were immediately centrifuged and plasma separated. The samples were divided into 13  
 433 aliquots and stored in conditions outlined in Table 4. After storage of samples in these test conditions, all samples were  
 434 kept at -80°C for 2-3 weeks before NMR analysis.

435 Table 4. Sample storage study protocol.

| Storage time ( $T_x$ ) | Storage temperature         |              |                           |                      |
|------------------------|-----------------------------|--------------|---------------------------|----------------------|
|                        | Sample transport simulation |              | Sample storage simulation |                      |
|                        | Room temperature            | Refrigerator | -20°C                     | -80°C                |
| 0 hours ( $T_0$ )      | S, EDTA, HP                 |              |                           |                      |
| 8 hours                | S, EDTA, HP                 | S, EDTA, HP  |                           |                      |
| 24 hours               | S, EDTA, HP                 | S, EDTA, HP  |                           |                      |
| 48 hours               | S, EDTA, HP                 | S, EDTA, HP  |                           |                      |
| 72 hours               | S, EDTA, HP                 | S, EDTA, HP  |                           |                      |
| 96 hours               | S, EDTA, HP                 | S, EDTA, HP  |                           |                      |
| 1 week                 | S, EDTA, HP                 | S, EDTA, HP  | S, EDTA                   | S, EDTA              |
| 2 weeks                |                             |              | S, EDTA                   | S, EDTA              |
| 1 month                |                             |              | S, EDTA                   | S, EDTA              |
| 3 months               |                             |              | S, EDTA                   | S, EDTA              |
| 6 months               |                             |              | S, EDTA <sup>a</sup>      | S, EDTA              |
| 12 months              |                             |              |                           | S, EDTA <sup>a</sup> |

436 S: serum

437 EDTA: EDTA plasma

438 HP: lithium heparin plasma

439

440 <sup>a</sup>The EDTA plasma yield of two included dogs was slightly smaller than expected due to high hematocrit. For both  
 441 dogs, one storage time point had to be excluded. The other sample was excluded from the 6 months storage of EDTA  
 442 plasma at -20°C and the other one from 12 months storage of EDTA plasma in -80°C.

443

444 We used the two-sided Wilcoxon exact test to estimate the statistical significance of the changes in analyte values  
 445 during sample storage. The test was performed between samples not subjected to storage ( $T_0$ ) and samples subjected to  
 446 different storage conditions at each storage time point ( $T_x$ ) in each storage temperature (Table 4). Two-sided p-values of  
 447 Wilcoxon test statistic less than 0.05 indicated a statistically significant difference between metabolite values in  $T_0$  and  
 448  $T_x$ .

449 In addition to the Wilcoxon test, we calculated the mean percentage deviation (MPD)

450

$$\text{MPD} = \left( \frac{T_{x\text{mean}} - T_{0\text{mean}}}{T_{0\text{mean}}} \right) \times 100,$$

451 to indicate the stability/instability, as well as magnitude of change in metabolite values over a period of time<sup>67</sup>. MPD

452 was compared to the acceptable change limit (ACL), according to ISO 5725-6<sup>68</sup>:

$$\text{ACL} = 2,77 \text{ CV}_a$$

453 The CV<sub>a</sub> was obtained from the precision study results presented in this study, calculated as the mean CV% of the non-

454 chylomicronemic samples. The factor 2,77 was derived from 1.96 x  $\sqrt{2}$ , where 1.96 represents the 95% of confidence

455 interval for bi-directional changes, and  $\sqrt{2}$  was used as we compared two results with the same CV<sub>a</sub>. A MPD higher

456 than the ACL represents a probable change in analyte concentration.

457

458 Outliers were detected by duplicate analysis of samples in storage time T<sub>x</sub> and collection time T<sub>0</sub>. Cut points to set the

459 sample as an outlier were

460

$$\overline{(T_x - T_0)} \pm 2 \cdot \text{STD}_{(T_x - T_0)},$$

461

462 where  $\overline{T_x - T_0}$  is the mean and  $\text{STD}_{(T_x - T_0)}$  the standard deviation between samples in storage time T<sub>x</sub> and collection

463 time T<sub>0</sub>.

464

465 If the difference T<sub>x<sub>i</sub></sub> - T<sub>0<sub>i</sub></sub> of the sample *i* exceeded or undercut these cut points, it was defined as an outlier. All

466 analyses were done as outliers included or not excluded in purpose to study the effect of outlier exclusion.

467 The criteria for clinically significant change was set so, that the change should be both statistically significant (p-value

468 of the two-sided Wilcoxon exact test <0.05) and the magnitude of the change, evaluated as MPD, was required to be

469 above the ACL, and the change was required to be consistent at the remaining time points. Sample stability was studied

470 only in primary analytes, analyte stability was not evaluated in ratio and percentage analytes.

471 **Delayed plasma separation study**



472 In the delayed plasma separation study, we defined, how delays of plasma separation time from the sample tube  
473 manufacturer's recommendations affect metabolite values. Delayed plasma separation was studied by storing samples  
474 as whole blood in refrigerated temperature for 24 and 48 hours before plasma separation.

475 Blood was drawn by cephalic venipuncture from 34 client-owned dogs into three Vacuette K2 EDTA tubes per dog.  
476 One of the tubes was centrifuged and plasma separated according to sample tube manufacturer's recommendations  
477 within one hour after blood sampling. The remaining two tubes were stored as whole blood in a refrigerator until  
478 centrifugation and plasma separation after 24 and 48 hours of storage. After plasma separation, all samples were stored  
479 at -80°C before NMR analysis. This experiment was conducted using an older version of the NMR testing platform,  
480 thus the number of tested analytes was smaller, and fatty acids were not quantified.

481 For statistical analyses, we used similar methods as in the sample storage study. We used the two-sided Wilcoxon exact  
482 test to assess the effect of storage time on the sample, and mean percentage deviation (MPD) to indicate  
483 stability/instability and magnitude of change. Acceptable change limits (ACL) were the same as in the storage study.  
484 Outlier detection followed the same procedure as in the storage study, and criteria for clinically significant change were  
485 set similarly as  $p < 0.05$  and  $MPD > ACL$ .  $T_0$  in the delayed plasma study represents plasma separated according to  
486 sample tube manufacturer's recommendations and  $T_x$  plasma separated after 24 and 48 hours.

#### 487 **Sample tube validation**

488 To study, whether metabolite values differ between samples collected in different blood collection tubes (BCT), we  
489 studied both differences between different blood collection tubes and lot-to-lot variability within these tubes. The  
490 protocol was modified from the proposed blood collection tube validation process by Bowen and Adcock<sup>69</sup>.

491 Thirty milliliters of blood was drawn from a cephalic iv-cannula from 20 dogs into seven different types of blood  
492 collection tubes; MiniCollect Serum Separator Clot Activator tube, Vacuette Z Serum Separator Clot Activator tube,  
493 Vacuette Z Serum Clot Activator tube, Vacuette K2 EDTA tube, MiniCollect Lithium Heparin Separator tube, Vacuette  
494 Lithium Heparin tube and Vacuette Lithium Heparin Separator tube. Each tube type was tested with two tubes from  
495 different lots. EDTA and lithium heparin samples were immediately centrifuged to separate plasma. Serum samples  
496 were allowed to clot for 30-45 minutes before serum separation. The centrifugation conditions for samples collected  
497 into MiniCollect tubes were 3,000 x g for 10 minutes, and 2,000 x g for 13 minutes for all other sample tube types. The  
498 tested sample tubes and their specifications are presented in Table 5. All samples were stored at -80°C before analysis  
499 with NMR spectroscopy. The sample tube validation was only conducted regarding primary analytes, not for ratio and  
500 percentage analytes.

501 Table 5. Specifications of the tested blood collection tubes in the sample tube validation study.

| Blood Collection tube                            | Sample type            | Clotting activator/anticoagulant                     | Gel type            | Lots                       |
|--------------------------------------------------|------------------------|------------------------------------------------------|---------------------|----------------------------|
| MiniCollect Serum Gel Tube 0,8ml                 | Serum                  | Clotting activator SiO <sub>2</sub>                  | Acrylic gel         | A: 171010<br>B: A18023K3   |
| Vacurette Z Serum Separator Clot Activator 3,5ml | Serum                  | Clotting activator SiO <sub>2</sub>                  | Olefin oligomer gel | A: A17103HT<br>B: A18024EJ |
| Vacurette Z Serum Clot Activator tube 2ml        | Serum                  | Clotting activator SiO <sub>2</sub>                  | -                   | A: A170837S<br>B: A180644P |
| Vacurette K2 EDTA Tube 2ml                       | EDTA-plasma            | Spray-dried K2 EDTA 1,2-2 mg (waterless)/ 1 ml blood | -                   | A: A17063FX<br>B: A18043H3 |
| MiniCollect Plasma Gel Tube 0,8ml                | Lithium heparin plasma | Spray-dried lithium heparin 18 I.U./1 ml blood       | Acrylic gel         | A: A17114HE<br>B: A18013N7 |
| Vacurette Lithium Heparin Tube 2ml               | Lithium heparin plasma | Spray-dried lithium heparin 18 I.U./1 ml blood       | -                   | A: A17083HR<br>B: A180247F |
| Vacurette Lithium Heparin Separator 3ml          | Lithium heparin plasma | Spray-dried lithium heparin 18 I.U./1 ml blood       | Olefin oligomer gel | A: A17123YY<br>B: A18053D8 |

502

503 We used the two-sided Wilcoxon exact test and mean percentage deviation (MPD) (detailed in 2.4 Sample storage  
504 study) to evaluate statistical significance of differences between the tubes.

505

506 Differences between different sample tubes were tested using this protocol:

507 1) Study, which tubes give comparable results with the primary reference tube

508 The Vacurette Lithium Heparin tube was set as the primary reference tube (T<sub>0</sub>) and all other tubes (T<sub>x</sub>) were compared  
509 against it.

510 Since we hypothesized, that most of the differences between sample tubes would originate from differences between  
511 serum and plasma, we secondly studied, which serum tubes give comparable results.

512 2) Study, which serum tubes give comparable results with the serum reference tube.

513 The Vacurette Z Serum Clot Activator tube was set as the serum reference tube (T<sub>0</sub>) and all other serum tubes (T<sub>x</sub>) were  
514 compared against it.

515

516 The average of the analyte values in the two lots was used in these calculations.

517

518 Lot-to-lot variability was tested using this protocol:

519 1) Compare the two lots of each tube to another.

520 Tubes in lot A were set as a reference tubes ( $T_0$ ) and tubes in lot B ( $T_x$ ) were compared against them

521 2) If lot-to-lot variability was observed, compare results of each lot to reference tubes. This was done to determine,  
522 whether samples from both lots give comparable results to the other tube types.

523 Lots A and B were compared separately to the Vacuette Lithium Heparin and Vacuette Z Serum Clot Activator tubes.

524

525 The same outlier detection protocol was used as in the sample storage study (2.4), except that we used coefficient 3 for  
526 STD (instead of 2) in cut points:  $(\overline{T_x - T_0}) \mp 3 \cdot \text{STD}_{(T_x - T_0)}$ . We set broader cut off limits for outlier detection for the  
527 sample tube validation than for the storage study, since the outlier test was more sensitive due to more observations in  
528 the sample tube validation than in the storage study.

529 In addition to the tests above, we calculated bias as mean difference of  $T_x$  and  $T_0$  with 95% confidence intervals, to  
530 highlight the limits in which the differences of the samples in tubes (or lots)  $T_x$  and  $T_0$  lie.

531 Although metabolite quantification is possible from citrate tubes, we did not include this tube type in this study, since  
532 this tube type is not generally used in clinical applications in this field.

### 533 **Interference**

534 We tested our metabolites for interference of hemolysis, lipemia, and unconjugated and conjugated bilirubin. The  
535 testing protocol was derived from CLSI-EP7-A2<sup>70</sup>.

536 Hemolysis interference was studied using two client-owned dogs. 5 ml heparinized blood was collected by cephalic  
537 venipuncture for preparation of the hemolysis stock solution. The samples were centrifuged and plasma separated and  
538 discarded. The red blood cells were saved for the preparation of hemolysis stock solution. The hemolysis stock solution  
539 was prepared by the osmotic shock procedure. The hemoglobin concentrations of the hemolysates were measured by  
540 ADVIA 2120i hematology analyzer (Siemens)<sup>71</sup>. The base of the test and control samples were created by collecting  
541 5ml heparinized blood by cephalic venipuncture from the same dogs that were used for the preparation of the  
542 hemoglobin stock solutions. Test samples containing 500 mg/dl hemoglobin were produced by adding a measured  
543 volume of the same dog's hemolysate to the same dog's plasma sample to produce the end concentration of 500mg/dl  
544 hemoglobin. Test samples containing 250mg/dl hemoglobin were prepared by mixing an equal amount of the same

545 dog's hemoglobin 500mg/dl test and control samples. All samples were divided into three aliquots and run as triplicates  
546 in the NMR analysis.

547 Bilirubin interference was studied by creating two sample pools (Pool 1 and Pool 2) from samples collected for the  
548 canine NMR metabolomics project. The sample pools were created so, that as many metabolite levels as possible would  
549 differ between the two pools. The baseline bilirubin concentrations of both pools were measured (540 nm) by a  
550 modified version of the acid diazo coupling (Malloy-Evelyn) method (Bilirubin Total (NBD), Thermo Fisher Scientific  
551 Oy, Finland), using a Konelab 60i chemistry analyzer<sup>72</sup>. The two pools were both divided into four pools, creating the  
552 bases for test and control pools for unconjugated bilirubin, and test and control pools for conjugated bilirubin. The test  
553 pools for conjugated bilirubin were prepared by adding bilirubin stock solution (201102 EMD Millipore) to the  
554 conjugated bilirubin test pool samples. The control pools for conjugated bilirubin were prepared by adding the same  
555 volume of water to the conjugated bilirubin control pool samples. The test pools for unconjugated bilirubin were  
556 prepared by adding bilirubin stock solution (2011 EMD Millipore) to the unconjugated bilirubin test pools. The control  
557 pools for unconjugated bilirubin were prepared by adding the same volume of NaOH to the unconjugated bilirubin  
558 control pool samples. All pools were divided into three aliquots and run as triplicates in the NMR analysis.

559 Lipemia interference was studied by pooling lipemic serum samples collected for the canine NMR metabolomics  
560 project. The test pool was created so, that the triglyceride concentration would be around 2mmol/l. The pool was  
561 divided into a test and control pool. The lipids of the control pool were cleared by ultracentrifugation. Both samples  
562 were divided into three aliquots and run as triplicates by NMR.

563 We used CLSI-EP7-A2<sup>70</sup> guidelines as the base for our statistical testing. Interference testing was only evaluated  
564 regarding primary analytes, analyte stability was not evaluated in ratio and percentage analytes. Our testing was based  
565 on the point estimate of the observed interference effect ( $d_{obs}$ ) and the cut-off value ( $d_c$ ) and the comparison of these  
566 values.

567 The interference  $d_{obs}$  was defined as difference between the means of the test and control samples:

568  $d_{obs} = \bar{x}_{test} - \bar{x}_{control}$ , where test and control samples indicate samples with and without the interfering subject,  
569 respectively.

570

571 The cut-off value  $d_c$  was defined as  $d_c = \frac{d_{null} + s z_{1-\alpha/2}}{\sqrt{n}}$ , where  $d_{null}$  represented the assumed difference between the

572 means of test and control samples (set to 0),  $n$  was the number of replicates ( $n=3$ ) and  $s$  was the mean within-laboratory

573 standard deviation ( $S_T$ ) of non-lipemic samples obtained from the precision study results presented in this study. 95%  
574 confidence intervals for the  $d_{obs}$  were calculated as

$$575 \quad d_{obs} = \bar{x}_{test} - \bar{x}_{control} \pm t_{0,975,n-1} S \sqrt{\frac{2}{n}}.$$

576 We established our decision of interference in the lower 95% limit of interference limit  $d_{obs,low}$  - interference was  
577 concluded to be present, if  $d_{obs,low} > d_c$  in at least one primary sample/sample pool, since properties of the sample  
578 matrix and/or analyte concentrations might affect the presence of interference. Hemolysis interference was concluded to  
579 be present if  $d_{obs,low} > d_c$  in at least the higher hemolysate concentration of 500mg/dl hemoglobin. Lipemia  
580 interference was only evaluated for molecules other than lipids, since the lipid removal process inevitably decreases the  
581 concentration of these molecules.

## 582 **Method comparison**

583 The method comparison study was designed to evaluate, whether results from the routine clinical chemistry analytes  
584 included in the NMR metabolomics platform are comparable with results obtained by a conventional clinical chemistry  
585 method. The evaluated analytes were glucose, lactate, creatinine, albumin, cholesterol and triglycerides. In this study,  
586 bias was only evaluated as a measure of method interchangeability, since the values obtained by the conventional  
587 method cannot be regarded as true values of the analyte.

588

589 Clinical canine samples ( $n = 999$ ) were studied by both NMR and standard clinical chemistry analysis methods. The  
590 samples included both heparin plasma and serum samples. The used samples were routine diagnostic sample material  
591 submitted by veterinarians across Finland, sent by mail to a single laboratory provider (Movet Ltd, Kuopio, Finland).  
592 Upon arrival, the samples were divided into two aliquots. One aliquot was immediately analyzed with conventional  
593 laboratory methods. Triglycerides were analyzed by a photometric method, cholesterol by a colorimetric method,  
594 albumin by a colorimetric method using bromcresol green, glucose by a photometric method using hexokinase,  
595 creatinine by a colorimetric enzymatic method and lactate by an enzymatic photometric method. The other aliquot was  
596 frozen and kept at  $-20^\circ\text{C}$  for a maximum of 4 weeks before shipment to NMR analysis. The samples were sent in three  
597 batches on cool packs to NMR analysis, shipping time 7-14 hours. After arrival at the NMR laboratory, the samples  
598 were again stored at  $-80^\circ\text{C}$  before NMR analysis. One of the sample shipments was sent over a 14h period on cool  
599 packs and partly thawed during shipment. Samples that were sent with a 7h shipment duration remained frozen during  
600 transportation. 404 of the samples were used for scaling the NMR albumin measurement, and thus excluded from the  
601 method comparison of albumin.

602 Statistical analysis followed the ASVCP General Quality Control Guidelines<sup>73</sup>. Agreement of the results was viewed  
603 using a comparison plot with values the NMR method plotted on the y-axis and the conventional method on the x-axis.  
604 Agreement plots were created for raw data and logarithm transformed data. Bland-Altman plots<sup>74</sup> were used to  
605 visualize the distribution of differences.

606

607 We utilized Deming regression<sup>75,76</sup> in calculation of slope and intercept for all analytes, and in addition, linear  
608 regression for analytes with correlation over 0,99. Agreement of Deming transformed data was visualized by adding an  
609 agreement plot for data in which conventional method data was transformed using Deming regression coefficients. To  
610 determine the mean bias in the unit of the analyte at both ends of the reference intervals, bias was determined by slope  
611 and intercept of the Deming regression for these points:

612

$$\text{Bias} = X_c(\text{slope} - 1) + \text{intercept},$$

614

615 where  $X_c$  is the corresponding end of the reference interval.

616

617 To determine the interchangeability of results obtained by the conventional and NMR method,  $TE_{\text{obs}}$  was evaluated  
618 against ASVCP clinical chemistry guidelines based on Clinical Decision Limits<sup>41</sup>, which reflect the maximum values  
619 that would affect clinical decision-making. Observed Total Error  $TE_{\text{obs}}$  was calculated using the formula<sup>41</sup>:

$$TE_{\text{obs}} = 2CVa + \text{Bias}\%,$$

620 where CVa was the mean CV% of the non-lipemic samples in the precision study and the mean bias percentage (Bias%)  
621 was calculated using the formula<sup>41</sup>:

$$\text{Bias}\% = \frac{\text{Mean}_{\text{NMR}} - \text{Mean}_{\text{conventional}}}{\text{Mean}_{\text{conventional}}} \times 100.$$

622

### 623 **Hyperglycemia-associated biomarkers**

624 In order to demonstrate the utility of the developed method in an important biological question, we studied the  
625 differences in metabolite profiles in a hyperglycemic and normoglycemic group. We used the results of the 999 clinical  
626 canine samples utilized in the method comparison study as our base population for the study. No clinical data was  
627 available for the samples.

628 Diabetes mellitus is defined as a disorder, where blood glucose continuously rises over the renal glucose reabsorption  
629 threshold of 11mmol/l, causing glucosuria. The inclusion criteria to the case group (n = 24) was set as a NMR-measured  
630 glucose concentration over 11mmol/l. Inclusion to the control group (n=781) was based on the NMR-measured glucose  
631 being within the serum all dogs' reference interval (4.4-6.8mmol/l). Since the control group consisted of clinical  
632 samples submitted to a clinical laboratory, the control group most likely includes animals suffering from diseases, that  
633 do not cause hyperglycemia.

634 To define metabolic changes associated with hyperglycemia, we calculated the means and their 95% CI for the case and  
635 control groups as well as the effect sizes of the observed changes. To visualize the differences in analyte concentrations  
636 between the two groups, we plotted histograms of the analyte data of the two groups. The significance of the difference  
637 between the metabolite values in the case and control group was studied using the two-sided Wilcoxon test's  
638 Bonferroni-corrected p-values, with the cut-off for statistical significance set as  $p < 0.05$ .

639  
640 To evaluate the metabolite's ability of predicting hyperglycemia, we used single-variable logistic regression, in which  
641 case-control status served as the response variable and individual metabolites as dependent variables. Together with the  
642 metabolite's maximum likelihood estimate's p-value (significant  $< 0.05$ ), area under the curve (AUC) values calculated  
643 for the model were used to determine the predictability of hyperglycemia, when the abnormal metabolite value is  
644 present. The higher the AUC value is ( $\leq 1$ ), the better the fit of the model in terms of predicting ability; 0.7 being the cut  
645 point for fair, 0.8 for good and 0.9 for excellent model. Akaike information criterion (AIC) was performed in  
646 comparison of the models using different metabolites. It has no cut-off point and a lower AIC indicates better model,  
647 assuming that the test population in the models is the same. Glucose was excluded from this analysis, since it was used  
648 to define the case and control groups.

649  
650 All calculations and plotting conducted throughout this study were performed by SAS version 9.4, SAS Institute Inc.,  
651 Cary, NC, USA and Microsoft Office Excel, Microsoft Corp., Redmond, WA, US.

652

### 653 **Acknowledgements**

654

655 We thank Kibble Labs Ltd. for the development and calibration of the canine NMR metabolomics platform, as well as  
656 NMR analysis of all samples. We thank Petra Jaakonsaari, Oona Mäki, Lea Mikkola, Marjo Hytönen and Maria  
657 Kaukonen for sample collection and Ileana Quintero for sample preparation for the interference experiment. Thomas  
658 Grönthal in the Veterinary Teaching Hospital, University of Helsinki, is acknowledged for performing the hemoglobin  
659 and bilirubin concentration measurements. We thank Sini Karjalainen, Kaisu Hiltunen, Reetta Hänninen, Juulia

660 Tuominen, Kaisa Kyöstilä, Riika Sarviaho, Milla Salonen, and multiple veterinary students for help with sample  
661 collection and handling, and César Araujo for help with sample metadata management. We thank MediSapiens Ltd. for  
662 sample data and metadata management. We thank our collaborators Faunatar and ShowHau Center for enabling sample  
663 collection in their premises. We thank Movet Ltd. for the acquisition of the method comparison samples, and their  
664 analysis with conventional clinical chemistry methods. The authors also want to thank all dog owners, who offered their  
665 pets to participate in the study.

#### 666 **Author Contributions**

667 HL and CO conceptualized the study. CO, JP, LV, KV and HL designed the study. HL, CO, JP and LV participated in  
668 sample recruitment and collection. KV and CO conducted statistical analyses. HL supervised the study. CO drafted the  
669 manuscript with the help from other authors. All authors read and approved the final manuscript.

#### 670 **Funding**

671 The study was funded by PetBiomics Ltd.

#### 672 **Author Conflict of Interest Statement**

673 CO is an employee, KV a previous employee, and HL is an owner and the Chairman of the Board of PetBiomics Ltd.

#### 674 **Ethical Approval**

675 All applicable international, national, and/or institutional guidelines for the care and use of animals were followed. All  
676 procedures performed in studies involving animals were in accordance with the ethical standards of the institution or  
677 practice at which the studies were conducted. Committee: Finnish national Animal Experiment Board, permit number:  
678 ESAVI/7482/04.10.07/2015.

#### 679 **Data availability**

680 The datasets generated during the current study are available from the corresponding authors upon request.

#### 681 **References**

- 682 1. Colyer, A., Gilham, M. S., Kamlage, B., Rein, D. & Allaway, D. Identification of intra- and inter-individual  
683 metabolite variation in plasma metabolite profiles of cats and dogs. *Br. J. Nutr.* **106 Suppl**, S146-9 (2011).
- 684 2. Richards, S. E. *et al.* Self-modeling curve resolution recovery of temporal metabolite signal modulation in  
685 NMR spectroscopic data sets: application to a life-long caloric restriction study in dogs. *Anal. Chem.* **80**, 4876–  
686 4885 (2008).
- 687 3. Hall, J. A., Brockman, J. A. & Jewell, D. E. Dietary fish oil alters the lysophospholipid metabolomic profile and



- 688 decreases urinary 11-dehydro thromboxane B(2) concentration in healthy Beagles. *Vet. Immunol.*  
689 *Immunopathol.* **144**, 355–365 (2011).
- 690 4. Allaway, D. *et al.* Metabolomic profiling to identify effects of dietary calcium reveal the influence of the  
691 individual and postprandial dynamics on the canine plasma metabolome. *J. Nutr. Sci.* **8**, e13 (2019).
- 692 5. Hall, J. A., Jackson, M. I., Vondran, J. C., Vanchina, M. A. & Jewell, D. E. Comparison of circulating  
693 metabolite concentrations in dogs and cats when allowed to freely choose macronutrient intake. *Biol. Open* **7**,  
694 (2018).
- 695 6. Allaway, D. Nutritional Metabolomics: Lessons from Companion Animals. *Curr. Metabolomics* **80** (2015).  
696 doi:<https://doi.org/10.2174/2213235X03666141216203315>
- 697 7. Richards, S. E. *et al.* Metabolic phenotype modulation by caloric restriction in a lifelong dog study. *J. Proteome*  
698 *Res.* **12**, 3117–3127 (2013).
- 699 8. Middleton, R. P. *et al.* Metabolic Differences between Dogs of Different Body Sizes. *J. Nutr. Metab.* **2017**,  
700 4535710 (2017).
- 701 9. Lloyd, A. J. *et al.* Characterisation of the main drivers of intra- and inter- breed variability in the plasma  
702 metabolome of dogs. *Metabolomics* **12**, 72 (2016).
- 703 10. Yan, G. *et al.* Investigation of toxicological effects of Shuanghuanglian injection in Beagle dogs by  
704 metabonomic and traditional approaches. *Exp. Biol. Med. (Maywood)*. **235**, 1356–1364 (2010).
- 705 11. Osaki, T. *et al.* Metabolomic analyses of blood plasma after oral administration of D-glucosamine  
706 hydrochloride to dogs. *Mar. Drugs* **10**, 1873–1882 (2012).
- 707 12. Puurunen, J. *et al.* Fearful dogs have increased plasma glutamine and  $\gamma$ -glutamyl glutamine. *Sci. Rep.* **8**, 15976  
708 (2018).
- 709 13. Puurunen, J. *et al.* A non-targeted metabolite profiling pilot study suggests that tryptophan and lipid  
710 metabolisms are linked with ADHD-like behaviours in dogs. *Behav. Brain Funct.* **12**, 27 (2016).
- 711 14. Gamble, L.-J. *et al.* Serum metabolomics of Alaskan sled dogs during endurance racing. *Comp. Exerc. Physiol.*  
712 **14**, 1–12 (2018).
- 713 15. Soh, P. X. Y. *et al.* Genome-wide association studies of 74 plasma metabolites of German shepherd dogs reveal

- 714 two metabolites associated with genes encoding their enzymes. *Metabolomics* **15**, 123 (2019).
- 715 16. O’Kell, A. L., Garrett, T. J., Wasserfall, C. & Atkinson, M. A. Untargeted metabolomic analysis in naturally  
716 occurring canine diabetes mellitus identifies similarities to human Type 1 Diabetes. *Sci. Rep.* **7**, 9467 (2017).
- 717 17. Minamoto, Y. *et al.* Alteration of the fecal microbiota and serum metabolite profiles in dogs with idiopathic  
718 inflammatory bowel disease. *Gut Microbes* **6**, 33–47 (2015).
- 719 18. Söder, J. *et al.* Plasma metabolomics reveals lower carnitine concentrations in overweight Labrador Retriever  
720 dogs. *Acta Vet. Scand.* **61**, 10 (2019).
- 721 19. Li, Q. *et al.* Veterinary Medicine and Multi-Omics Research for Future Nutrition Targets: Metabolomics and  
722 Transcriptomics of the Common Degenerative Mitral Valve Disease in Dogs. *OMICS* **19**, 461–470 (2015).
- 723 20. Gookin, J. L., Mathews, K. G., Cullen, J. & Seiler, G. Qualitative metabolomics profiling of serum and bile  
724 from dogs with gallbladder mucocele formation. *PLoS One* **13**, e0191076 (2018).
- 725 21. Guard, B. C. *et al.* Characterization of microbial dysbiosis and metabolomic changes in dogs with acute  
726 diarrhea. *PLoS One* **10**, e0127259 (2015).
- 727 22. Lawrence, Y. A. *et al.* Untargeted metabolomic profiling of serum from dogs with chronic hepatic disease. *J.*  
728 *Vet. Intern. Med.* (2019). doi:10.1111/jvim.15479
- 729 23. Whitfield, P. D. *et al.* Metabolomics as a diagnostic tool for hepatology: validation in a naturally occurring  
730 canine model. *Metabolomics* **1**, 215–225 (2005).
- 731 24. Forster, G. M. *et al.* A Comparative Study of Serum Biochemistry, Metabolome and Microbiome Parameters of  
732 Clinically Healthy, Normal Weight, Overweight, and Obese Companion Dogs. *Top. Companion Anim. Med.* **33**,  
733 126–135 (2018).
- 734 25. O’Kell, A. L., Garrett, T. J., Wasserfall, C. & Atkinson, M. A. Untargeted metabolomic analysis in non-fasted  
735 diabetic dogs by UHPLC--HRMS. *Metabolomics* **15**, 15 (2019).
- 736 26. Mora-Ortiz, M., Nuñez Ramos, P., Oregioni, A. & Claus, S. P. NMR metabolomics identifies over 60  
737 biomarkers associated with Type II Diabetes impairment in db/db mice. *Metabolomics* **15**, 89 (2019).
- 738 27. Dunn, W. B., Broadhurst, D. I., Atherton, H. J., Goodacre, R. & Griffin, J. L. Systems level studies of  
739 mammalian metabolomes: the roles of mass spectrometry and nuclear magnetic resonance spectroscopy. *Chem.*

- 740            *Soc. Rev.* **40**, 387–426 (2011).
- 741    28.    Fischer, K. *et al.* Biomarker profiling by nuclear magnetic resonance spectroscopy for the prediction of all-  
742            cause mortality: an observational study of 17,345 persons. *PLoS Med.* **11**, e1001606 (2014).
- 743    29.    Wurtz, P. *et al.* Quantitative Serum Nuclear Magnetic Resonance Metabolomics in Large-Scale Epidemiology:  
744            A Primer on -Omic Technologies. *Am. J. Epidemiol.* **186**, 1084–1096 (2017).
- 745    30.    Kettunen, J. *et al.* Genome-wide study for circulating metabolites identifies 62 loci and reveals novel systemic  
746            effects of LPA. *Nat. Commun.* **7**, 11122 (2016).
- 747    31.    Wurtz, P. *et al.* Lipoprotein subclass profiling reveals pleiotropy in the genetic variants of lipid risk factors for  
748            coronary heart disease: a note on Mendelian randomization studies. *Journal of the American College of*  
749            *Cardiology* **62**, 1906–1908 (2013).
- 750    32.    Nicholson, J. K. Global systems biology, personalized medicine and molecular epidemiology. *Molecular*  
751            *systems biology* **2**, 52 (2006).
- 752    33.    Ye, L. & Mao, W. Metabonomic biomarkers for risk factors of chronic kidney disease. *Int. Urol. Nephrol.* **48**,  
753            547–552 (2016).
- 754    34.    Klein, M. S. & Shearer, J. Metabolomics and Type 2 Diabetes: Translating Basic Research into Clinical  
755            Application. *J. Diabetes Res.* **2016**, 3898502 (2016).
- 756    35.    Kwo, P. Y., Cohen, S. M. & Lim, J. K. ACG Clinical Guideline: Evaluation of Abnormal Liver Chemistries.  
757            *Am. J. Gastroenterol.* **112**, 18–35 (2017).
- 758    36.    Koulouri, O., Moran, C., Halsall, D., Chatterjee, K. & Gurnell, M. Pitfalls in the measurement and  
759            interpretation of thyroid function tests. *Best Pract. Res. Clin. Endocrinol. Metab.* **27**, 745–762 (2013).
- 760    37.    Braun, J. P., Lefebvre, H. P. & Watson, A. D. J. Creatinine in the Dog: A Review. *Vet. Clin. Pathol.* **32**, 162–  
761            179 (2003).
- 762    38.    Zatelli, A., D'Ippolito, P., Roura, X. & Zini, E. Short-term effects of dietary supplementation with amino acids  
763            in dogs with proteinuric chronic kidney disease. *Can. Vet. J. = La Rev. Vet. Can.* **58**, 1287–1293 (2017).
- 764    39.    Friedrichs, K. R. *et al.* ASVCP reference interval guidelines: determination of de novo reference intervals in  
765            veterinary species and other related topics. *Vet. Clin. Pathol.* **41**, 441–453 (2012).

- 766 40. Soininen, P. *et al.* High-throughput serum NMR metabonomics for cost-effective holistic studies on systemic  
767 metabolism. *Analyst* **134**, 1781–1785 (2009).
- 768 41. Harr, K. E., Flatland, B., Nabity, M. & Freeman, K. P. ASVCP guidelines: allowable total error guidelines for  
769 biochemistry. *Vet. Clin. Pathol.* **42**, 424–436 (2013).
- 770 42. Guasch-Ferre, M. *et al.* Metabolomics in Prediabetes and Diabetes: A Systematic Review and Meta-analysis.  
771 *Diabetes Care* **39**, 833–846 (2016).
- 772 43. Deelen, J. *et al.* A metabolic profile of all-cause mortality risk identified in an observational study of 44,168  
773 individuals. *Nat. Commun.* **10**, 3346 (2019).
- 774 44. Wang, T. J. *et al.* Metabolite profiles and the risk of developing diabetes. *Nat. Med.* **17**, 448–453 (2011).
- 775 45. Otvos, J. D. *et al.* GlycA: A Composite Nuclear Magnetic Resonance Biomarker of Systemic Inflammation.  
776 *Clin. Chem.* **61**, 714–723 (2015).
- 777 46. Connelly, M. A., Otvos, J. D., Shalaurova, I., Playford, M. P. & Mehta, N. N. GlycA, a novel biomarker of  
778 systemic inflammation and cardiovascular disease risk. *J. Transl. Med.* **15**, 219 (2017).
- 779 47. Ritchie, S. C. *et al.* The Biomarker GlycA Is Associated with Chronic Inflammation and Predicts Long-Term  
780 Risk of Severe Infection. *Cell Syst.* **1**, 293–301 (2015).
- 781 48. Fizelova, M. *et al.* Differential Associations of Inflammatory Markers With Insulin Sensitivity and Secretion:  
782 The Prospective METSIM Study. *J. Clin. Endocrinol. Metab.* **102**, 3600–3609 (2017).
- 783 49. Wang, Q. *et al.* Metabolic profiling of pregnancy: cross-sectional and longitudinal evidence. *BMC Med.* **14**, 205  
784 (2016).
- 785 50. Lepage, N., McDonald, N., Dallaire, L. & Lambert, M. Age-specific distribution of plasma amino acid  
786 concentrations in a healthy pediatric population. *Clin. Chem.* **43**, 2397 LP-2402 (1997).
- 787 51. von Dehn, B. Pediatric clinical pathology. *Vet. Clin. North Am. Small Anim. Pract.* **44**, 205–219 (2014).
- 788 52. Willems, A. *et al.* Results of Screening of Apparently Healthy Senior and Geriatric Dogs. *J. Vet. Intern. Med.*  
789 **31**, 81–92 (2017).
- 790 53. Usui, S., Mizoguchi, Y., Yasuda, H., Arai, N. & Koketsu, Y. Dog age and breeds associated with high plasma  
791 cholesterol and triglyceride concentrations. *J. Vet. Med. Sci.* **76**, 269–272 (2014).

- 792 54. Braun, J.-P., Bourges-Abella, N., Geffre, A., Concordet, D. & Trumel, C. The preanalytic phase in veterinary  
793 clinical pathology. *Vet. Clin. Pathol.* **44**, 8–25 (2015).
- 794 55. Thoresen, S. I., Havre, G. N., Morberg, H. & Mowinckel, P. Effects of storage time on chemistry results from  
795 canine whole blood, heparinized whole blood, serum and heparinized plasma. *Vet. Clin. Pathol.* **21**, 88–94  
796 (1992).
- 797 56. Davis, J. S. *et al.* Ex-vivo changes in amino acid concentrations from blood stored at room temperature or on  
798 ice: implications for arginine and taurine measurements. *BMC Clin. Pathol.* **9**, 10 (2009).
- 799 57. Breier, M. *et al.* Targeted metabolomics identifies reliable and stable metabolites in human serum and plasma  
800 samples. *PLoS One* **9**, e89728 (2014).
- 801 58. Kirwan, J. A. *et al.* Preanalytical Processing and Biobanking Procedures of Biological Samples for  
802 Metabolomics Research: A White Paper, Community Perspective (for ‘Precision Medicine and  
803 Pharmacometabolomics Task Group’-The Metabolomics Society Initiative). *Clin. Chem.* **64**, 1158–1182 (2018).
- 804 59. Okazaki, M. *et al.* Identification of unique lipoprotein subclasses for visceral obesity by component analysis of  
805 cholesterol profile in high-performance liquid chromatography. *Arterioscler. Thromb. Vasc. Biol.* **25**, 578–584  
806 (2005).
- 807 60. Clinical & Laboratory Standards Institute [CLSI]. Evaluation of Precision of Quantitative Measurement  
808 Procedures; Approved Guideline – Third Edition. (2014).
- 809 61. Ceriotti, F. *et al.* Criteria for assigning laboratory measurands to models for analytical performance  
810 specifications defined in the 1st EFLM Strategic Conference. *Clin. Chem. Lab. Med.* **55**, 189–194 (2017).
- 811 62. Sandberg, S. *et al.* Defining analytical performance specifications: Consensus Statement from the 1st Strategic  
812 Conference of the European Federation of Clinical Chemistry and Laboratory Medicine. *Clin. Chem. Lab. Med.*  
813 **53**, 833–835 (2015).
- 814 63. Townsend, M. K. *et al.* Reproducibility of metabolomic profiles among men and women in 2 large cohort  
815 studies. *Clin. Chem.* **59**, 1657–1667 (2013).
- 816 64. Rosner, B. *Fundamentals of Biostatistics*. (Duxbury Press, 2005).
- 817 65. Tonks, D. Quality Control Systems in clinical chemistry laboratories. *Postgrad. Med.* A58–A70 (1963).

- 818 66. Oosterhuis, W. Analytical performance specifications in clinical chemistry: the holy grail? *J. Lab. Precis. Med.*  
819 2, 78 (2017).
- 820 67. International Organization for Standardization [ISO]. Reference materials — Selected terms and definitions,  
821 ISO GUIDE 30:2015. (2015).
- 822 68. International Organization for Standardization [ISO]. Accuracy (trueness and precision) of measurement  
823 methods and results. ISO 5725:1994. (1994).
- 824 69. Bowen, R. A. R. & Adcock, D. M. Blood collection tubes as medical devices: The potential to affect assays and  
825 proposed verification and validation processes for the clinical laboratory. *Clin. Biochem.* **49**, 1321–1330 (2016).
- 826 70. Clinical & Laboratory Standards Institute [CLSI]. Interference Testing in Clinical Chemistry, 2nd Edition.  
827 (2005).
- 828 71. Bauer, N. & Moritz, A. Evaluation of three methods for measurement of hemoglobin and calculated  
829 hemoglobin variables with the ADVIA 120 and ADVIA 2120 systems in goats. *J. Vet. Diagn. Invest.* **20**, 593–  
830 597 (2008).
- 831 72. Parviainen, M. T. A modification of the acid diazo coupling method (Malloy-Evelyn) for the determination of  
832 serum total bilirubin. *Scand. J. Clin. Lab. Invest.* **57**, 275–279 (1997).
- 833 73. American Society for Veterinary Clinical Pathology [ASVCP]. Principles of quality assurance and standards for  
834 veterinary clinical pathology. (2009).
- 835 74. Bland, J. M. & Altman, D. G. Statistical methods for assessing agreement between two methods of clinical  
836 measurement. *Lancet (London, England)* **1**, 307–310 (1986).
- 837 75. Jensen, A. L. & Kjelgaard-Hansen, M. Method comparison in the clinical laboratory. *Vet. Clin. Pathol.* **35**,  
838 276–286 (2006).
- 839 76. Linnet, K. Evaluation of regression procedures for methods comparison studies. *Clin. Chem.* **39**, 424–432  
840 (1993).
- 841
